# Supplementary material
Source: PubMed Central journal article supplement (PMC8379536)
Supplement: sbaa195_suppl_supplementary_table_1.pdf [file sbaa195_suppl_supplementary_table_1.pdf]

**Supplementary Table 1. Demographic characteristics of subjects retained after QC and PCA analysis**

| Case# | DX      | DSM DX | 2' DX   | Cause of death           | Manner of death | Sex | Age | Race | PMI (h) | pH  | RIN      | Suicide | Smoke | APD | AD | Benz/<br>VPA | Lithium | Storage<br>Time (m) | A1      | A2      | A3      | A4      | A5      | Brain regions used<br>after QC/PCA |
|-------|---------|--------|---------|--------------------------|-----------------|-----|-----|------|---------|-----|----------|---------|-------|-----|----|--------------|---------|---------------------|---------|---------|---------|---------|---------|------------------------------------|
| 516   | Control | none   | Control | Gunshot wound            | Homicide        | M   | 20  | B    | 14      | 6.9 | 9.0, 8.0 | N       | N     | N   | N  | N            | N       | 211                 | -0.0802 | 0.00098 | 0.02809 | -0.0061 | -0.0167 | DLPFC, ACC                         |
| 546   | Control | none   | Control | Cardiovascular disease   | Natural         | F   | 37  | W    | 23.5    | 6.7 | 9.2, 8.0 | N       | U     | N   | N  | N            | N       | 207                 | 0.02125 | 0.02603 | 0.00087 | -0.0207 | 0.00488 | DLPFC, ACC                         |
| 551   | Control | none   | Control | Cardiac tamponade        | Natural         | M   | 61  | W    | 16.4    | 6.6 | 8.9, 8.0 | N       | U     | N   | N  | N            | N       | 206                 | 0.02144 | 0.03391 | 0.00345 | -0.0301 | 0.02362 | DLPFC, ACC                         |
| 567   | Control | none   | Control | Mitral valve prolapse    | Natural         | F   | 46  | W    | 15.0    | 6.7 | 7.5      | N       | U     | N   | N  | N            | N       | 203                 | 0.02124 | 0.02221 | -1E-04  | -0.028  | -0.0008 | ACC                                |
| 592   | Control | none   | Control | Cardiovascular disease   | Natural         | M   | 41  | B    | 22.1    | 6.7 | 9.1, 8.3 | N       | Y     | N   | N  | N            | N       | 198                 | -0.0873 | 0.00084 | 0.01848 | -0.0052 | -0.0002 | DLPFC, ACC                         |
| 604   | Control | none   | Control | Cardiovascular disease   | Natural         | M   | 39  | W    | 19.3    | 7.1 | 8.9, 7.8 | N       | N     | N   | N  | N            | N       | 196                 | 0.02062 | 0.00011 | 0.00538 | 0.00793 | -0.0009 | DLPFC, ACC                         |
| 630   | Control | none   | Control | Cardiovascular disease   | Natural         | M   | 65  | W    | 21.2    | 7.0 | 8.4, 7.4 | N       | N     | N   | N  | N            | N       | 193                 | 0.0209  | 0.0283  | 0.00324 | -0.0041 | 0.02597 | DLPFC, ACC                         |
| 634   | Control | none   | Control | Cardiovascular disease   | Natural         | M   | 52  | W    | 16.2    | 7.0 | 8.5, 7.9 | N       | U     | N   | N  | N            | N       | 192                 | 0.02063 | 0.02023 | -0.0024 | 0.01096 | 0.01095 | DLPFC, ACC                         |
| 681   | Control | none   | Control | Cardiomyopathy           | Natural         | M   | 51  | W    | 11.6    | 7.2 | 8.7, 8.3 | N       | N     | N   | N  | N            | N       | 186                 | 0.02116 | 0.0206  | 0.0031  | -0.0175 | 0.0069  | DLPFC, ACC                         |
| 685   | Control | none   | Control | Cardiovascular disease   | Natural         | M   | 56  | W    | 14.5    | 6.6 | 8.7, 8.9 | N       | N     | N   | N  | N            | N       | 186                 | 0.02193 | 0.01736 | 0.00128 | 0.00245 | 0.00374 | DLPFC, ACC                         |
| 686   | Control | none   | Control | Cardiovascular disease   | Natural         | F   | 52  | W    | 22.6    | 7.0 | 8.4, 8.7 | N       | Y     | N   | N  | N            | N       | 185                 | 0.02139 | 0.02818 | 0.00351 | 0.0183  | -0.0433 | DLPFC, ACC                         |
| 694   | Control | none   | Control | Subarachnoid hemorrhage  | Natural         | M   | 38  | W    | 20.7    | 7.0 | 8.3, 7.0 | N       | N     | N   | N  | N            | N       | 186                 | 0.02153 | 0.03047 | 0.00575 | -0.0107 | -0.0038 | DLPFC, ACC                         |
| 700   | Control | none   | Control | Cardiovascular disease   | Natural         | M   | 42  | W    | 26.1    | 7.0 | 8.5      | N       | U     | N   | N  | N            | N       | 183                 | 0.0202  | -0.005  | -0.0013 | 0.0416  | -0.0045 | DLPFC                              |
| 727   | Control | none   | Control | Blunt force trauma       | Accidental      | M   | 19  | B    | 7.0     | 7.2 | 9.0, 9.1 | N       | N     | N   | N  | N            | N       | 179                 | -0.0863 | 0.00098 | 0.03169 | -0.0012 | -0.0071 | DLPFC, ACC                         |
| 739   | Control | none   | Control | Cardiovascular disease   | Natural         | M   | 40  | W    | 15.8    | 6.9 | 8.5, 8.8 | N       | Y     | N   | N  | N            | N       | 180                 | 0.02193 | 0.02336 | 0.00779 | -0.0038 | 0.0092  | DLPFC, ACC                         |
| 789   | Control | none   | Control | Asphyxiation             | Accidental      | M   | 22  | W    | 20.1    | 6.8 | 8.2, 8.0 | N       | N     | N   | N  | N            | N       | 174                 | 0.02052 | 0.00553 | -0.0047 | 0.01552 | -0.031  | DLPFC, ACC                         |
| 795   | Control | none   | Control | Ruptured aortic aneurysm | Natural         | M   | 68  | W    | 11.8    | 6.8 | 7.0, 7.2 | N       | N     | N   | N  | N            | N       | 172                 | 0.02022 | 0.00875 | 0.00151 | -0.0044 | 0.00066 | DLPFC, ACC                         |
| 806   | Control | none   | Control | Pulmonary embolism       | Natural         | M   | 57  | W    | 24.0    | 6.9 | 8.6, 7.7 | N       | N     | N   | N  | N            | N       | 166                 | 0.01937 | -0.0375 | 0.00192 | 0.14883 | -0.0198 | DLPFC, ACC                         |
| 818   | Control | none   | Control | Anaphylaxis              | Accidental      | F   | 67  | W    | 24      | 7.1 | 8.7, 8.4 | N       | N     | N   | N  | N            | N       | 164                 | 0.02127 | 0.02728 | 0.00634 | 0.00661 | 0.01862 | DLPFC, ACC                         |

|      |         |      |         |                                       |            |   |    |   |      |     |          |   |   |   |   |   |   |     |         |         |         |         |         |            |
|------|---------|------|---------|---------------------------------------|------------|---|----|---|------|-----|----------|---|---|---|---|---|---|-----|---------|---------|---------|---------|---------|------------|
| 822  | Control | none | Control | Cardiovascular disease                | Natural    | M | 28 | B | 25.3 | 7.0 | 7.7, 7.6 | N | N | N | N | N | N | 162 | -0.0854 | 0.00086 | 0.02964 | 0.00062 | -0.0106 | DLPFC, ACC |
| 838  | Control | none | Control | Cardiovascular disease                | Natural    | M | 58 | W | 16.5 | 7.0 | 8.8, 7.5 | N | N | N | N | N | N | 165 | 0.02135 | 0.02292 | -0.0029 | -0.0244 | -0.0034 | DLPFC, ACC |
| 840  | Control | none | Control | Cardiovascular disease                | Natural    | F | 41 | W | 15.4 | 6.6 | 8.3, 7.8 | N | Y | N | N | N | N | 162 | 0.0214  | 0.03081 | 0.00445 | 0.00144 | -0.034  | DLPFC, ACC |
| 841  | Control | none | Control | Cardiomyopathy                        | Natural    | M | 70 | W | 21.2 | 7.2 | 8.1, 7.3 | N | N | N | N | N | N | 164 | 0.02209 | 0.02462 | 0.00859 | -0.0034 | -0.0024 | DLPFC, ACC |
| 852  | Control | none | Control | Cardiac tamponade                     | Natural    | M | 54 | W | 8.0  | 6.8 | 8.6, 8.7 | N | Y | N | N | N | N | 155 | 0.02164 | 0.0324  | 0.00169 | -0.0115 | 0.0109  | DLPFC, ACC |
| 857  | Control | none | Control | Cardiovascular disease                | Natural    | M | 48 | W | 16.6 | 6.7 | 7.9      | N | Y | N | N | N | N | 154 | 0.02051 | 0.02501 | -0.0019 | -0.0314 | 0.03046 | ACC        |
| 871  | Control | none | Control | Blunt force trauma                    | Accidental | M | 28 | W | 16.5 | 7.1 | 7.9      | N | Y | N | N | N | N | 152 | 0.02106 | 0.0107  | 0.00558 | 0.02009 | -0.0007 | ACC        |
| 902  | Control | none | Control | Cardiovascular disease                | Natural    | M | 60 | W | 23.6 | 6.7 | 8.7      | N | Y | N | N | N | N | 147 | 0.02112 | 0.01796 | -0.0024 | -0.0065 | -0.0157 | DLPFC      |
| 970  | Control | none | Control | Cardiovascular disease                | Natural    | M | 42 | W | 25.9 | 6.4 | 7.8, 6.9 | N | Y | N | N | N | N | 133 | 0.02145 | 0.02849 | 0.00258 | -0.0094 | 0.00347 | DLPFC, ACC |
| 987  | Control | none | Control | Cardiovascular disease                | Natural    | F | 65 | W | 21.5 | 6.8 | 8.7, 7.7 | N | N | N | N | N | N | 131 | 0.02074 | 0.02445 | -0.0004 | -0.0467 | 0.00781 | DLPFC, ACC |
| 988  | Control | none | Control | Blunt force trauma                    | Accidental | M | 82 | W | 22.5 | 6.2 | 8.4, 7.9 | N | N | N | N | N | N | 131 | 0.02173 | 0.02465 | 0.00484 | -0.0337 | 0.00932 | DLPFC, ACC |
| 1026 | Control | none | Control | Cardiovascular disease                | Natural    | M | 59 | W | 19.8 | 6.3 | 8.2      | N | Y | N | N | N | N | 125 | 0.02079 | 0.02087 | 0.00387 | 0.01553 | -0.0163 | DLPFC      |
| 1031 | Control | none | Control | Cardiovascular disease                | Natural    | M | 53 | W | 23.2 | 6.8 | 8.5, 7.9 | N | N | N | N | N | N | 130 | 0.0217  | 0.02187 | 0.00564 | -0.0265 | 0.01616 | DLPFC, ACC |
| 1047 | Control | none | Control | Cardiovascular disease                | Natural    | M | 43 | W | 13.8 | 6.6 | 9.0, 7.7 | N | N | N | N | N | N | 122 | 0.02097 | 0.03008 | 0.00475 | -0.0259 | 0.00415 | DLPFC, ACC |
| 1081 | Control | none | Control | Chronic Obstructive Pulmonary disease | Natural    | F | 57 | W | 14.9 | 6.8 | 8.5, 8.6 | N | N | N | N | Y | N | 124 | 0.02166 | 0.02079 | 0.00319 | -0.0111 | -0.0099 | DLPFC, ACC |
| 1086 | Control | none | Control | Cardiovascular disease                | Natural    | M | 51 | W | 24.2 | 6.8 | 8.9, 8.7 | N | Y | N | N | N | N | 115 | 0.02048 | 0.03429 | 0.00078 | -0.0387 | -0.0392 | DLPFC, ACC |
| 1092 | Control | none | Control | Mitral Valve Prolapse                 | Natural    | F | 40 | B | 16.6 | 6.8 | 8.7, 7.9 | N | N | N | N | N | N | 115 | -0.0849 | 0.00097 | 0.02503 | -0.0065 | -0.006  | DLPFC, ACC |
| 1099 | Control | none | Control | Cardiomyopathy                        | Natural    | F | 24 | W | 9.1  | 6.5 | 9.3, 8.6 | N | Y | N | N | N | N | 114 | 0.02069 | 0.01466 | 0.00369 | 0.04843 | -0.015  | DLPFC, ACC |
| 1122 | Control | none | Control | Cardiac Tamponade                     | Natural    | M | 55 | W | 15.4 | 6.7 | 9.0, 8.6 | N | Y | N | N | N | N | 111 | 0.01896 | -0.0183 | 0.00178 | 0.0825  | -0.0599 | DLPFC, ACC |
| 1153 | Control | none | Control | Cardiovascular disease                | Natural    | M | 55 | W | 28.0 | 6.1 | 8.5, 8.1 | N | N | N | N | N | N | 113 | 0.02038 | 0.03831 | -0.0105 | -0.0139 | 0.03658 | DLPFC, ACC |

|      |         |      |         |                        |            |   |    |   |      |     |          |   |   |   |   |   |   |     |         |         |         |         |         |            |
|------|---------|------|---------|------------------------|------------|---|----|---|------|-----|----------|---|---|---|---|---|---|-----|---------|---------|---------|---------|---------|------------|
| 1191 | Control | none | Control | Cardiovascular disease | Natural    | M | 59 | B | 19.4 | 6.2 | 8.4      | N | Y | N | N | N | N | 104 | -0.0865 | 0.00091 | 0.02604 | -0.0021 | -0.011  | DLPFC      |
| 1196 | Control | none | Control | Asphyxiation           | Accidental | F | 36 | W | 14.5 | 6.4 | 8.4      | N | N | N | N | N | N | 109 | 0.02053 | 0.03086 | 0.00163 | -0.0282 | 0.00934 | DLPFC      |
| 1247 | Control | none | Control | Cardiovascular disease | Natural    | F | 58 | W | 22.7 | 6.4 | 7.9, 8.3 | N | N | N | N | N | N | 96  | 0.02065 | -0.0036 | -0.0028 | 0.01303 | -0.0114 | DLPFC, ACC |
| 1268 | Control | none | Control | Cardiovascular disease | Natural    | M | 49 | B | 19.9 | 7.1 | 8.9, 8.6 | N | N | N | N | N | N | 93  | -0.0878 | 0.00078 | 0.02662 | 0.0027  | 0.0069  | DLPFC, ACC |
| 1270 | Control | none | Control | Blunt force trauma     | Accidental | F | 73 | W | 19.7 | 6.7 | 8.4, 7.3 | N | N | N | N | N | N | 93  | 0.01837 | -0.0811 | 0.00304 | -0.0311 | 0.00823 | DLPFC, ACC |
| 1282 | Control | none | Control | Cardiovascular disease | Natural    | F | 39 | W | 24.5 | 6.8 | 8.8, 8.0 | N | N | N | N | N | N | 95  | 0.02129 | 0.02796 | 0.00491 | -0.022  | 0.0004  | DLPFC, ACC |
| 1284 | Control | none | Control | Cardiovascular disease | Natural    | M | 55 | W | 6.4  | 6.8 | 9.2, 9.2 | N | Y | N | N | N | N | 90  | 0.02125 | 0.0037  | 0.0066  | 0.05392 | -0.0369 | DLPFC, ACC |
| 1293 | Control | none | Control | Blunt force trauma     | Accidental | F | 65 | W | 18.5 | 6.5 | 8.4, 8.2 | N | N | N | N | N | N | 94  | 0.02086 | 0.02838 | -0.0009 | -0.0327 | 0.00119 | DLPFC, ACC |
| 1298 | Control | none | Control | Cardiovascular disease | Natural    | M | 48 | W | 24.5 | 6.5 | 8.0, 6.8 | N | N | N | N | N | N | 92  | 0.02179 | 0.02127 | 0.00329 | 0.01659 | -0.0454 | DLPFC, ACC |
| 1307 | Control | none | Control | Cardiovascular disease | Natural    | M | 32 | B | 4.8  | 6.7 | 7.1      | N | Y | N | N | N | N | 85  | -0.0796 | 0.00084 | 0.01671 | 0.0002  | -0.0129 | DLPFC      |
| 1324 | Control | none | Control | Aortic Dissection      | Natural    | M | 43 | W | 22.3 | 7   | 9.0, 8.3 | N | N | N | N | N | N | 82  | 0.02054 | 0.00746 | -0.0049 | 0.09252 | -0.0247 | DLPFC, ACC |
| 1326 | Control | none | Control | Cardiovascular disease | Natural    | M | 58 | W | 16.4 | 6.7 | 8.7, 7.7 | N | N | N | N | N | N | 82  | 0.02089 | 0.03083 | 0.00088 | -0.0213 | 0.02467 | DLPFC, ACC |
| 1336 | Control | none | Control | Cardiac Tamponade      | Natural    | M | 65 | W | 18.4 | 6.8 | 8.0, 8.4 | N | Y | N | N | N | N | 80  | 0.0214  | 0.02846 | 0.00449 | -0.0143 | 0.014   | DLPFC, ACC |
| 1350 | Control | none | Control | Blunt force trauma     | Accidental | M | 21 | W | 24.2 | 6.4 | 8.6, 7.5 | N | Y | N | N | N | N | 79  | 0.02159 | 0.02189 | 0.00507 | 0.0266  | -0.0106 | DLPFC, ACC |
| 1372 | Control | none | Control | Asphyxiation           | Accidental | M | 37 | W | 20.5 | 6.6 | 8.6, 7.8 | N | U | N | N | N | N | 76  | 0.02058 | 0.02945 | -0.0015 | -0.0092 | -0.0523 | DLPFC, ACC |
| 1374 | Control | none | Control | Cardiovascular disease | Natural    | M | 43 | W | 21.7 | 6.6 | 8.2, 7.7 | N | Y | N | N | N | N | 76  | 0.0206  | 0.02689 | -0.003  | -0.0083 | 0.00665 | DLPFC, ACC |
| 1386 | Control | none | Control | Cardiovascular disease | Natural    | M | 46 | W | 21.2 | 6.7 | 8.4      | N | Y | N | N | N | N | 72  | 0.02038 | 0.03152 | 0.00165 | -0.0044 | -0.0178 | DLPFC      |
| 1391 | Control | none | Control | Cardiovascular disease | Natural    | F | 51 | W | 7.8  | 6.6 | 8.0, 8.4 | N | Y | N | N | N | N | 71  | 0.02119 | 0.02425 | -6E-05  | 0.01648 | -0.023  | DLPFC, ACC |
| 1394 | Control | none | Control | Cardiovascular disease | Natural    | M | 45 | W | 17.3 | 6.6 | 8.6, 7.3 | N | N | N | N | N | N | 77  | 0.02197 | 0.02764 | 0.00332 | 0.01514 | -0.0091 | DLPFC, ACC |
| 1403 | Control | none | Control | Cardiovascular disease | Natural    | F | 45 | W | 12.3 | 6.4 | 8.2, 8.3 | N | Y | N | N | N | N | 76  | 0.02088 | 0.02607 | 0.00528 | 0.01044 | -0.0006 | DLPFC, ACC |

|      |         |      |         |                         |            |   |    |   |      |     |          |   |   |   |   |   |   |    |         |         |         |         |         |            |
|------|---------|------|---------|-------------------------|------------|---|----|---|------|-----|----------|---|---|---|---|---|---|----|---------|---------|---------|---------|---------|------------|
| 1429 | Control | none | Control | Cardiomyopathy          | Natural    | M | 44 | B | 23.9 | 6.8 | 9.2, 8.4 | N | N | N | N | N | N | 72 | -0.0855 | 0.001   | 0.02932 | -0.0035 | -0.0053 | DLPFC, ACC |
| 1433 | Control | none | Control | Blunt force trauma      | Accidental | M | 65 | W | 24.1 | 6.8 | 8.6, 8.5 | N | N | N | N | N | N | 64 | 0.0213  | 0.0282  | 0.00055 | -0.0269 | 0.02988 | DLPFC, ACC |
| 1444 | Control | none | Control | Pulmonary embolism      | Natural    | M | 46 | W | 22.0 | 6.3 | 8.1, 5.8 | N | N | N | N | N | N | 66 | 0.02181 | 0.03091 | 0.00234 | -0.0374 | -0.0122 | DLPFC, ACC |
| 1466 | Control | none | Control | Blunt force trauma      | Accidental | F | 64 | B | 20.0 | 6.7 | 8.8, 8.2 | N | N | N | N | N | N | 58 | -0.0739 | 0.00088 | 0.02544 | -0.0035 | -0.0148 | DLPFC, ACC |
| 1472 | Control | none | Control | Pulmonary embolism      | Natural    | M | 61 | W | 23.8 | 6.5 | 8.8, 7.1 | N | N | N | N | N | N | 57 | 0.02154 | 0.03105 | 0.0044  | -0.0015 | -0.0017 | DLPFC, ACC |
| 1482 | Control | none | Control | Cardiovascular disease  | Natural    | M | 25 | W | 20.2 | 6.6 | 9.1, 7.3 | N | N | N | N | N | N | 63 | 0.02157 | 0.01187 | 0.0039  | 0.01125 | 0.00026 | DLPFC, ACC |
| 1489 | Control | none | Control | Hypoglycemia            | Natural    | M | 25 | W | 16.9 | 5.9 | 8.3, 7.9 | N | N | N | N | N | N | 62 | 0.02162 | 0.0205  | 0.00494 | -0.0132 | 0.01599 | DLPFC, ACC |
| 1518 | Control | none | Control | Cardiovascular disease  | Natural    | M | 50 | W | 20.7 | 6.4 | 8.0, 7.2 | N | Y | N | N | N | N | 47 | 0.02021 | -0.0062 | -0.0013 | 0.06276 | -0.0107 | DLPFC, ACC |
| 1524 | Control | none | Control | Intestinal infarction   | Natural    | M | 66 | W | 9.4  | 6.4 | 9.3, 7.9 | N | N | N | N | N | N | 46 | 0.02095 | 0.03    | 0.00114 | -0.0032 | 0.00346 | DLPFC, ACC |
| 1543 | Control | none | Control | Subarachnoid hemorrhage | Natural    | F | 45 | W | 17.9 | 6.8 | 8.9, 6.4 | N | Y | N | N | N | N | 43 | 0.02121 | 0.03081 | 0.00518 | -0.0211 | 0.01054 | DLPFC, ACC |
| 1554 | Control | none | Control | Cardiovascular disease  | Natural    | M | 50 | W | 23.2 | 6.5 | 8.2, 7.5 | N | N | N | N | N | N | 41 | 0.02056 | 0.0197  | 0.0018  | -0.016  | 0.00788 | DLPFC, ACC |
| 1555 | Control | none | Control | Blunt force trauma      | Accidental | M | 17 | W | 15.1 | 6.9 | 9.1, 8.2 | N | Y | N | N | N | N | 41 | 0.0208  | 0.03044 | 0.00167 | 0.02006 | 0.01637 | DLPFC, ACC |
| 1558 | Control | none | Control | Cardiovascular disease  | Natural    | M | 54 | W | 24.4 | 6.9 | 8.7, 6.9 | N | N | N | N | N | N | 41 | 0.02134 | 0.02629 | 0.00647 | 0.01056 | -0.0067 | DLPFC, ACC |
| 1583 | Control | none | Control | Blunt force trauma      | Accidental | M | 58 | W | 19.1 | 6.8 | 9.0, 6.7 | N | Y | N | N | N | N | 36 | 0.02066 | 0.03271 | -0.0009 | -0.0173 | 0.00864 | DLPFC, ACC |
| 1598 | Control | none | Control | Cardiovascular disease  | Natural    | M | 50 | W | 23.8 | 6.9 | 8.2, 8.2 | N | N | N | N | N | N | 41 | 0.02137 | -0.002  | 0.0043  | 0.04597 | -0.009  | DLPFC, ACC |
| 1605 | Control | none | Control | Cardiovascular disease  | Natural    | F | 21 | W | 23.9 | 6.9 | 8.5, 8.1 | N | N | N | N | N | N | 39 | 0.02129 | 0.01115 | 0.00045 | 0.0332  | -0.0008 | DLPFC, ACC |
| 1635 | Control | none | Control | Cardiac tamponade       | Natural    | M | 66 | W | 25.3 | 6.8 | 7.9, 6.8 | N | N | N | N | N | N | 28 | 0.0213  | 0.03425 | 0.00473 | 0.00767 | -0.0226 | DLPFC, ACC |
| 1637 | Control | none | Control | Cardiovascular disease  | Natural    | M | 46 | W | 16.6 | 6.9 | 8.4, 7.3 | N | N | N | N | N | N | 35 | 0.01941 | 0.00399 | -0.0014 | 0.05023 | 0.0096  | DLPFC, ACC |
| 1694 | Control | none | Control | Acute myocarditis       | Natural    | F | 67 | W | 8.5  | 6.7 | 9.1, 8.1 | N | N | N | N | N | N | 23 | 0.02113 | 0.02908 | 0.00335 | 0.01381 | 0.02515 | DLPFC, ACC |
| 1770 | Control | none | Control | Asphyxiation            | Accidental | M | 52 | W | 28.2 | 6.8 | 8.2, 8.1 | N | N | N | N | N | N | 12 | 0.0213  | 0.00817 | 0.0059  | 0.02988 | 0.01177 | DLPFC, ACC |

|       |         |                                                  |            |                                 |            |   |    |   |      |     |          |   |   |   |   |   |   |     |         |         |         |         |         |            |
|-------|---------|--------------------------------------------------|------------|---------------------------------|------------|---|----|---|------|-----|----------|---|---|---|---|---|---|-----|---------|---------|---------|---------|---------|------------|
| 1783  | Control | none                                             | Control    | Blunt force trauma              | Accidental | F | 23 | W | 15.9 | 6.8 | 8.4, 8.4 | N | Y | N | N | N | N | 9   | 0.02038 | 0.0318  | -0.0036 | -0.0197 | 0.00652 | DLPFC, ACC |
| 1789  | Control | none                                             | Control    | Cardiovascular disease          | Natural    | F | 53 | W | 13.7 | 6.8 | 8.6, 7.6 | N | Y | N | N | N | N | 5   | 0.02138 | 0.03221 | 0.00393 | 0.00167 | -0.0149 | DLPFC, ACC |
| 1792  | Control | none                                             | Control    | Pulmonary embolism              | Natural    | F | 36 | W | 28.1 | 6.5 | 8.7, 8.1 | N | Y | N | N | N | N | 4   | 0.02138 | 0.02854 | 0.00462 | -0.0128 | -0.0264 | DLPFC, ACC |
| 10003 | Control | none                                             | Control    | Blunt force trauma              | Natural    | M | 49 | W | 21.2 | 6.5 | 8.4, 8.3 | N | N | N | N | N | N | 103 | 0.02045 | 0.03681 | 0.00113 | -0.0349 | 0.02127 | DLPFC, ACC |
| 10005 | Control | none                                             | Control    | Blunt force trauma              | Accidental | M | 42 | W | 23.5 | 6.7 | 9.0      | N | N | N | N | N | N | 103 | 0.02116 | 0.02878 | 0.00396 | 0.02181 | 0.01449 | DLPFC      |
| 10019 | Control | none                                             | Control    | Cardiomyopathy                  | Natural    | F | 41 | B | 19.3 | 6.6 | 8.8, 7.3 | N | N | N | N | N | N | 105 | -0.0865 | 0.00094 | 0.02923 | -0.0016 | -0.0082 | DLPFC, ACC |
| 533   | Schiz   | Chronic undifferentiated schizophrenia           | "pure" SCZ | Asphyxiation                    | Accidental | M | 40 | W | 29.1 | 6.8 | 9.0, 7.7 | N | U | Y | N | N | N | 208 | 0.01981 | -0.0212 | -0.0003 | 0.10041 | -0.0182 | DLPFC, ACC |
| 566   | Schiz   | Chronic undifferentiated schizophrenia; AAR      | "pure" SCZ | Cardiovascular disease          | Natural    | M | 63 | W | 18.3 | 6.8 | 7.8, 7.5 | N | Y | Y | Y | Y | N | 203 | 0.02143 | 0.02256 | 0.00482 | 0.0102  | 0.0297  | DLPFC, ACC |
| 581   | Schiz   | Chronic paranoid schizophrenia; ADC; OAC         | "pure" SCZ | Combined drug overdose          | Accidental | M | 46 | W | 28.1 | 7.2 | 8.1, 7.6 | N | U | Y | N | Y | N | 201 | 0.0219  | 0.01697 | 0.00664 | -0.0132 | 0.00756 | DLPFC, ACC |
| 587   | Schiz   | Chronic undifferentiated schizophrenia; AAR      | "pure" SCZ | Cardiovascular disease          | Natural    | F | 38 | B | 17.8 | 7.0 | 7.7, 8   | N | Y | Y | N | Y | N | 199 | -0.0856 | 0.00088 | 0.02185 | -0.0031 | 0.00407 | DLPFC, ACC |
| 621   | Schiz   | Chronic undifferentiated schizophrenia           | "pure" SCZ | Asphyxiation                    | Accidental | M | 83 | W | 16.0 | 7.3 | 8.3, 6.6 | N | U | N | N | N | N | 195 | 0.01668 | -0.0392 | -0.0091 | 0.11361 | -0.0559 | DLPFC, ACC |
| 622   | Schiz   | Chronic undifferentiated schizophrenia           | "pure" SCZ | Right MCA infarction            | Natural    | M | 58 | W | 18.9 | 6.8 | 7.9, 6.8 | N | Y | N | N | N | N | 194 | 0.02082 | 0.02904 | -0.003  | -0.0223 | 0.00145 | DLPFC, ACC |
| 625   | Schiz   | Chronic disorganized schizophrenia; AAC          | "pure" SCZ | Cardiovascular disease          | Natural    | M | 49 | B | 23.5 | 7.3 | 7.5, 7.6 | N | Y | Y | Y | N | N | 194 | -0.08   | 0.00102 | 0.01908 | -0.0069 | -0.0068 | DLPFC, ACC |
| 640   | Schiz   | Chronic paranoid schizophrenia                   | "pure" SCZ | Pulmonary embolism              | Natural    | M | 49 | W | 5.2  | 6.9 | 8.8, 8.1 | N | U | Y | Y | N | N | 191 | 0.02013 | 0.0242  | -0.0083 | -0.0074 | 0.02034 | DLPFC, ACC |
| 665   | Schiz   | Chronic paranoid schizophrenia; ADC              | "pure" SCZ | Intestinal hemorrhage           | Natural    | M | 59 | B | 28.1 | 6.9 | 8.6, 7.5 | N | Y | Y | Y | N | N | 190 | -0.068  | 0.00097 | 0.02732 | -0.0091 | -0.0056 | DLPFC, ACC |
| 722   | Schiz   | Chronic undifferentiated schizophrenia; ODR; OAR | "pure" SCZ | Upper Gastrointestinal bleeding | Natural    | M | 45 | B | 9.1  | 6.7 | 8.7, 9   | N | Y | Y | N | N | N | 180 | -0.0853 | 0.00088 | 0.03107 | -0.0009 | -0.0154 | DLPFC, ACC |
| 878   | Schiz   | Disorganized schizophrenia; ADC                  | "pure" SCZ | Myocardial fibrosis             | Natural    | M | 33 | W | 10.8 | 6.7 | 8.0      | N | Y | Y | Y | Y | N | 152 | 0.02101 | 0.03289 | 0.00087 | -0.0314 | 0.0122  | ACC        |
| 917   | Schiz   | Chronic undifferentiated schizophrenia           | "pure" SCZ | Cardiovascular disease          | Natural    | F | 71 | W | 23.8 | 6.8 | 7.7, 7.3 | N | Y | Y | N | N | N | 144 | 0.02153 | 0.00461 | 0.00118 | 0.0354  | -0.0051 | DLPFC, ACC |
| 933   | Schiz   | Disorganized schizophrenia                       | "pure" SCZ | Myocarditis                     | Natural    | M | 44 | W | 8.3  | 5.9 | 8.2, 6.9 | N | N | Y | Y | Y | N | 141 | 0.02155 | 0.02719 | 0.00271 | -0.0042 | -0.0162 | DLPFC, ACC |
| 1088  | Schiz   | Undifferentiated Schizophrenia; ADC; OAC         | "pure" SCZ | Combined drug overdose          | Accidental | M | 49 | W | 21.5 | 6.5 | 7.7, 8.1 | N | Y | Y | Y | N | N | 115 | 0.02164 | 0.02821 | 0.00334 | -0.0223 | -0.0253 | DLPFC, ACC |

|       |       |                                                     |            |                        |              |   |    |   |      |     |          |   |   |   |   |   |   |     |         |         |         |         |         |            |
|-------|-------|-----------------------------------------------------|------------|------------------------|--------------|---|----|---|------|-----|----------|---|---|---|---|---|---|-----|---------|---------|---------|---------|---------|------------|
| 1173  | Schiz | Disorganized schizophrenia; ADR                     | "pure" SCZ | Cardiovascular disease | Natural      | M | 62 | W | 22.9 | 6.4 | 8.0, 8.3 | N | Y | Y | N | N | N | 107 | 0.02085 | 0.02767 | -0.0054 | 0.00103 | -0.03   | DLPFC, ACC |
| 1188  | Schiz | Undifferentiated schizophrenia; AAR; OAR            | "pure" SCZ | Cardiovascular disease | Natural      | M | 58 | W | 7.7  | 6.2 | 8.6, 6.9 | N | Y | Y | N | N | N | 105 | 0.02023 | -0.0261 | 0.00422 | -0.0429 | 0.00247 | DLPFC, ACC |
| 1222  | Schiz | Undifferentiated schizophrenia; AAC                 | "pure" SCZ | Combined drug overdose | Suicide      | M | 32 | W | 30.8 | 6.4 | 7.1, 7.5 | Y | N | Y | Y | N | N | 100 | 0.02121 | 0.02965 | -0.0016 | -0.0054 | -0.0135 | DLPFC, ACC |
| 1230  | Schiz | Schizophrenia, undifferentiated type                | "pure" SCZ | Doxepin overdose       | Suicide      | M | 50 | W | 16.9 | 6.6 | 8.5, 8.2 | Y | Y | Y | Y | N | N | 99  | 0.02162 | 0.02673 | 0.00169 | 0.01058 | 0.00907 | DLPFC, ACC |
| 1240  | Schiz | Undifferentiated schizophrenia; ADR                 | "pure" SCZ | Cardiovascular disease | Natural      | F | 50 | B | 22.9 | 6.3 | 7.7, 7.6 | N | Y | Y | N | N | N | 96  | -0.0848 | 0.00086 | 0.02192 | -0.0037 | -0.0185 | DLPFC, ACC |
| 1256  | Schiz | Undifferentiated Schizophrenia                      | "pure" SCZ | Asphyxiation           | Suicide      | M | 34 | W | 27.4 | 6.4 | 8.3, 8.1 | Y | N | Y | N | N | N | 94  | 0.02116 | 0.03127 | -0.0024 | 0.00456 | 0.01584 | DLPFC, ACC |
| 1263  | Schiz | Undifferentiated schizophrenia; ADR                 | "pure" SCZ | Asphyxiation           | Accidental   | M | 62 | W | 22.7 | 7.1 | 8.9, 8.0 | N | Y | Y | Y | N | N | 94  | 0.02098 | 0.02579 | 0.00229 | 0.00191 | 0.031   | DLPFC, ACC |
| 1314  | Schiz | Undifferentiated schizophrenia                      | "pure" SCZ | Cardiovascular disease | Natural      | M | 50 | W | 11.0 | 6.2 | 8.9, 7.9 | N | N | Y | Y | N | N | 85  | 0.02074 | 0.0371  | 0.00481 | 0.00617 | 0.01956 | DLPFC, ACC |
| 1453  | Schiz | Schizophrenia, paranoid type; ADR                   | "pure" SCZ | Blunt force trauma     | Accidental   | M | 62 | W | 11.1 | 6.4 | 8.6, 8.2 | N | Y | Y | N | Y | N | 60  | 0.0223  | 0.03005 | 0.00517 | -0.0189 | -0.0149 | DLPFC, ACC |
| 1454  | Schiz | Schizophrenia, paranoid type; AAR; ODC              | "pure" SCZ | Blunt force trauma     | Accidental   | M | 59 | W | 24.1 | 6.1 | 8.0      | N | Y | Y | Y | N | N | 60  | 0.02138 | 0.01662 | 0.00487 | 0.00206 | -0.0074 | DLPFC      |
| 1455  | Schiz | Schizophrenia, paranoid type; AAR; OAC              | "pure" SCZ | Peritonitis            | Natural      | M | 42 | W | 8.2  | 6.4 | 8.6, 7.9 | N | Y | Y | Y | Y | N | 60  | 0.02152 | 0.03311 | 0.00163 | -0.0229 | 0.00542 | DLPFC, ACC |
| 1542  | Schiz | Schizophrenia, paranoid type                        | "pure" SCZ | Combined drug overdose | Undetermined | M | 65 | W | 17.4 | 6.7 | 8.3, 8.2 | N | Y | Y | Y | Y | N | 43  | 0.02156 | 0.03173 | 0.00202 | -0.0057 | -0.0019 | DLPFC, ACC |
| 1581  | Schiz | Schizophrenia, paranoid type; ODC; OAC              | "pure" SCZ | Cardiovascular disease | Natural      | M | 32 | W | 18.4 | 6.8 | 8.6, 7.8 | N | Y | Y | Y | N | N | 36  | 0.02052 | 0.02583 | 0.00534 | 0.02348 | 0.00403 | DLPFC, ACC |
| 1649  | Schiz | Schizophrenia, undifferentiated type                | "pure" SCZ | Asphyxiation           | Suicide      | M | 17 | B | 21.4 | 6.9 | 8.6, 7.9 | Y | N | Y | Y | N | N | 26  | -0.0843 | 0.00091 | 0.02651 | -0.0005 | -0.0081 | DLPFC, ACC |
| 1686  | Schiz | Schizophrenia, paranoid type; AAR                   | "pure" SCZ | Cardiovascular disease | Natural      | M | 56 | B | 14.1 | 6.2 | 8.9, 8.1 | N | Y | Y | Y | Y | N | 19  | -0.0862 | 0.00099 | 0.02885 | -0.0016 | -0.0023 | DLPFC, ACC |
| 1691  | Schiz | Schizophrenia, paranoid type; ADR; ODC              | "pure" SCZ | Combined drug overdose | Accidental   | M | 51 | W | 31.9 | 6.6 | 6.2, 6.1 | N | Y | Y | N | Y | Y | 18  | 0.02077 | 0.03457 | -0.0026 | -0.0118 | -0.0052 | DLPFC, ACC |
| 1734  | Schiz | Schizophrenia, undifferentiated type; AAR; ODC; OAR | "pure" SCZ | Pneumonia              | Natural      | M | 54 | W | 28.6 | 6.1 | 8.4, 6.8 | N | Y | Y | N | N | N | 9   | 0.02136 | 0.03543 | 0.00218 | -0.0396 | 0.0254  | DLPFC, ACC |
| 10020 | Schiz | Paranoid schizophrenia; AAC; OAC                    | "pure" SCZ | Salicylate overdose    | Suicide      | M | 38 | W | 28.8 | 6.6 | 8.3, 7.1 | Y | Y | Y | Y | Y | N | 96  | 0.02137 | 0.0307  | 0.00131 | 0.01283 | -0.0175 | DLPFC, ACC |
| 10023 | Schiz | Disorganized schizophrenia                          | "pure" SCZ | Drowning               | Suicide      | F | 25 | B | 20.1 | 6.7 | 7.6, 7   | Y | N | Y | N | Y | N | 95  | -0.0817 | 0.00096 | 0.02135 | -0.0012 | 0.00355 | DLPFC, ACC |
| 10024 | Schiz | Paranoid schizophrenia                              | "pure" SCZ | Cardiovascular disease | Natural      | M | 37 | B | 6.0  | 6.1 | 7.3, 6.9 | N | N | N | N | N | N | 95  | -0.0862 | 0.00078 | 0.02611 | 0.00515 | 0.00651 | DLPFC, ACC |

|       |       |                                         |            |                          |            |   |    |   |      |     |          |   |   |   |   |   |   |     |         |         |         |         |         |            |
|-------|-------|-----------------------------------------|------------|--------------------------|------------|---|----|---|------|-----|----------|---|---|---|---|---|---|-----|---------|---------|---------|---------|---------|------------|
| 10025 | Schiz | Disorganized schizophrenia; OAR         | "pure" SCZ | Cardiovascular disease   | Natural    | M | 52 | B | 27.1 | 6.7 | 7.9, 8.0 | N | Y | N | N | N | N | 94  | -0.0836 | 0.00095 | 0.02879 | -0.0036 | 0.00424 | DLPFC, ACC |
| 10026 | Schiz | Schizophrenia, undifferentiated type    | "pure" SCZ | Thermal injuries         | Suicide    | F | 46 | W | 23.8 | 6.6 | 8.5, 7.4 | Y | Y | Y | Y | N | N | 95  | 0.02133 | 0.03387 | 0.00399 | -0.0028 | 0.0035  | DLPFC, ACC |
| 537   | Schiz | Schizoaffective disorder                | SA         | Asphyxiation             | Suicide    | F | 37 | W | 14.5 | 6.7 | 8.0      | Y | U | N | N | N | N | 207 | 0.02175 | 0.02727 | -0.0009 | 0.02662 | -0.012  | ACC        |
| 539   | Schiz | Schizoaffective disorder; ADR           | SA         | Combined drug overdose   | Suicide    | M | 50 | W | 40.5 | 7.1 | 8.0      | Y | U | Y | Y | Y | N | 207 | 0.02103 | 0.02861 | -0.0041 | -0.0139 | -0.008  | DLPFC      |
| 547   | Schiz | Schizoaffective disorder                | SA         | Heat Stroke              | Accidental | M | 27 | B | 16.5 | 7.0 | 8.0, 7.7 | N | Y | Y | Y | Y | Y | 207 | -0.081  | 0.00074 | 0.01799 | 0.00311 | -0.0067 | DLPFC, ACC |
| 656   | Schiz | Schizoaffective disorder; ADC           | SA         | Gunshot wound            | Suicide    | F | 47 | B | 20.1 | 7.3 | 8.7, 7.7 | Y | Y | Y | N | N | N | 190 | -0.0749 | 0.00093 | 0.03066 | -0.0032 | -0.0311 | DLPFC, ACC |
| 781   | Schiz | Schizoaffective disorder; ADR           | SA         | Peritonitis              | Natural    | M | 52 | B | 8.0  | 6.7 | 7.2, 6.1 | N | Y | Y | Y | N | N | 170 | -0.0849 | 0.00075 | 0.02168 | -0.0001 | 0.00115 | DLPFC, ACC |
| 787   | Schiz | Schizoaffective disorder; ODC           | SA         | Gunshot wound            | Suicide    | M | 27 | B | 19.2 | 6.7 | 7.5, 7.6 | Y | N | Y | N | N | N | 168 | -0.085  | 0.00087 | 0.02261 | -0.0039 | 0.00049 | DLPFC, ACC |
| 802   | Schiz | Schizoaffective disorder; ADC; ODR      | SA         | Cardiovascular disease   | Natural    | F | 63 | W | 29.0 | 6.4 | 8.5, 8.1 | N | Y | Y | N | Y | N | 166 | 0.02065 | 0.01479 | -0.0032 | -0.0208 | -0.0491 | DLPFC, ACC |
| 829   | Schiz | Schizoaffective disorder; ADC; OAR      | SA         | Salicylate overdose      | Suicide    | M | 25 | W | 5.0  | 6.8 | 8.6, 8.6 | Y | Y | N | N | Y | N | 160 | 0.0207  | -0.002  | 0.00618 | 0.02358 | -0.0086 | DLPFC, ACC |
| 904   | Schiz | Schizoaffective Disorder                | SA         | Pneumonia                | Natural    | M | 33 | W | 28.0 | 6.2 | 6.7, 6.4 | N | Y | Y | N | Y | N | 147 | 0.02039 | 0.01858 | 0.00221 | 0.03459 | 0.02769 | DLPFC, ACC |
| 1105  | Schiz | Schizoaffective disorder                | SA         | Cardiovascular disease   | Natural    | M | 53 | W | 7.9  | 6.2 | 9.1, 8.0 | N | Y | Y | N | N | N | 113 | 0.02056 | 0.00633 | 0.00454 | 0.04982 | 0.01639 | DLPFC, ACC |
| 1178  | Schiz | Schizoaffective disorder                | SA         | Pulmonary embolism       | Natural    | F | 37 | B | 18.9 | 6.1 | 8.9, 8.1 | N | Y | Y | N | Y | N | 106 | -0.0821 | 0.00086 | 0.02636 | -0.0013 | -0.0171 | DLPFC, ACC |
| 1189  | Schiz | Schizoaffective disorder; AAR           | SA         | Combined drug overdose   | Suicide    | F | 47 | W | 14.4 | 6.4 | 7.9, 8.0 | Y | Y | Y | Y | Y | N | 104 | 0.02184 | 0.02982 | 0.00493 | 0.01074 | 0.00004 | DLPFC, ACC |
| 1209  | Schiz | Schizoaffective disorder                | SA         | Diphenhydramine overdose | Suicide    | M | 35 | W | 9.1  | 6.5 | 9.6, 8.2 | Y | N | Y | N | N | N | 102 | 0.02096 | 0.02148 | 0.00667 | -0.0167 | 0.01842 | DLPFC, ACC |
| 1211  | Schiz | Schizoaffective disorder                | SA         | Cardiovascular disease   | Natural    | F | 41 | W | 20.1 | 6.3 | 9.0, 8.3 | N | Y | Y | Y | N | N | 102 | 0.02238 | 0.02169 | 0.00398 | 0.01528 | 0.0043  | DLPFC, ACC |
| 1341  | Schiz | Schizoaffective Disorder; ODC           | SA         | Penetrating force trauma | Accidental | F | 44 | W | 24.5 | 6.6 | 8.3, 7.3 | N | N | Y | N | Y | N | 80  | 0.02167 | 0.02778 | 0.00508 | 0.00215 | -0.0103 | DLPFC, ACC |
| 1361  | Schiz | Schizoaffective disorder; ODC           | SA         | Cardiomyopathy           | Natural    | M | 63 | W | 23.2 | 6.4 | 8.6, 8.4 | N | Y | Y | N | Y | N | 77  | 0.02136 | 0.03142 | 0.00047 | 0.00728 | -0.0366 | DLPFC, ACC |
| 1367  | Schiz | Schizoaffective Disorder; ADC; ODR      | SA         | Combined drug overdose   | Accidental | M | 47 | W | 28.9 | 6.6 | 7.5, 7.3 | N | N | N | N | N | N | 77  | 0.02194 | 0.02355 | 0.00619 | -0.0053 | 0.00888 | DLPFC, ACC |
| 1420  | Schiz | Schizoaffective Disorder; AAR; ODC; OAR | SA         | Blunt force trauma       | Suicide    | M | 47 | W | 23.4 | 6.8 | 8.2, 7.9 | Y | Y | Y | Y | N | N | 66  | 0.02122 | 0.03742 | 0.00265 | -0.0341 | 0.01222 | DLPFC, ACC |

|       |         |                                         |      |                        |            |   |    |   |      |     |          |   |   |   |   |   |   |     |         |         |         |         |         |            |
|-------|---------|-----------------------------------------|------|------------------------|------------|---|----|---|------|-----|----------|---|---|---|---|---|---|-----|---------|---------|---------|---------|---------|------------|
| 1474  | Schiz   | Schizoaffective Disorder; ADR           | SA   | Asphyxiation           | Suicide    | M | 37 | W | 39.9 | 6.7 | 8.1, 7.8 | Y | N | N | N | N | N | 57  | 0.02166 | 0.03757 | 0.00121 | -0.0171 | -0.006  | DLPFC, ACC |
| 1506  | Schiz   | Schizoaffective Disorder; ADC           | SA   | Combined drug overdose | Accidental | F | 47 | W | 14.1 | 6.6 | 7.2, 7.1 | N | Y | Y | Y | N | N | 51  | 0.02088 | 0.02197 | -0.0013 | 0.00476 | -0.0089 | DLPFC, ACC |
| 1579  | Schiz   | Schizoaffective Disorder; ADR; ODC      | SA   | Cardiovascular disease | Natural    | F | 69 | W | 16.1 | 6.7 | 8.2, 7.3 | N | Y | Y | N | Y | N | 36  | 0.02127 | -0.0024 | 0.00229 | 0.05393 | 0.0008  | DLPFC, ACC |
| 1706  | Schiz   | Schizoaffective Disorder; AAR; ODC; OAR | SA   | Sepsis                 | Natural    | M | 60 | B | 28.1 | 6.8 | 8.4, 8.0 | N | Y | Y | N | N | N | 14  | -0.0853 | 0.00081 | 0.02218 | 0.00399 | 0.00534 | DLPFC, ACC |
| 1712  | Schiz   | Schizoaffective Disorder; ADR; ODC      | SA   | Cardiovascular disease | Natural    | M | 63 | W | 15.1 | 6.2 | 7.9, 5.6 | N | N | Y | Y | Y | N | 13  | 0.02037 | -0.0053 | -0.0014 | -0.019  | 0.00613 | DLPFC, ACC |
| 697   | Bipolar | Bipolar I +P                            | BP+P | Exsanguination         | Suicide    | M | 39 | W | 24.2 | 6.6 | 8.1, 6.7 | Y | U | N | N | Y | N | 190 | 0.02152 | 0.0294  | 0.00376 | 0.00396 | 0.00874 | DLPFC, ACC |
| 984   | Bipolar | Bipolar I +P                            | BP+P | Combined drug overdose | Accidental | F | 42 | W | 31.2 | 6.5 | 7.2      | N | Y | Y | Y | N | Y | 136 | 0.02189 | 0.02642 | 0.00297 | -0.018  | -0.0121 | DLPFC      |
| 1020  | Bipolar | Bipolar I +P; ADC; ODC                  | BP+P | Combined drug overdose | Accidental | M | 42 | W | 12.5 | 6.7 | 8.6, 7.8 | N | Y | N | Y | Y | N | 131 | 0.02086 | 0.0424  | -0.0049 | -0.0343 | -0.0278 | DLPFC, ACC |
| 1044  | Bipolar | Bipolar I +P                            | BP+P | Cardiovascular disease | Natural    | F | 56 | W | 24.5 | 6.1 | 7.5, 6.6 | N | N | N | Y | Y | N | 127 | 0.02139 | 0.01301 | 0.00699 | -0.0142 | -0.0248 | DLPFC, ACC |
| 1048  | Bipolar | Bipolar I +P                            | BP+P | Asphyxiation           | Suicide    | F | 51 | W | 21.5 | 6.7 | 7.9, 8.6 | Y | Y | N | Y | N | N | 126 | 0.02036 | 0.00449 | 0.00288 | 0.02195 | -0.0009 | DLPFC, ACC |
| 1121  | Bipolar | Bipolar I +P; ADR                       | BP+P | Pulmonary embolism     | Natural    | M | 40 | W | 18.5 | 6.4 | 9.1, 7.8 | N | N | Y | N | Y | N | 116 | 0.0159  | 0.01715 | -0.0238 | 0.01081 | 0.03703 | DLPFC, ACC |
| 1130  | Bipolar | Bipolar I +P; AAR                       | BP+P | Esophageal cancer      | Natural    | M | 65 | W | 8.9  | 6.7 | 7.5, 8.1 | N | U | Y | Y | Y | N | 115 | 0.02119 | 0.02283 | -0.0009 | 0.01424 | 0.01924 | DLPFC, ACC |
| 1180  | Bipolar | Bipolar I +P                            | BP+P | Blunt force trauma     | Suicide    | F | 28 | W | 22.3 | 6.3 | 8.4, 7.5 | Y | N | N | Y | N | N | 111 | 0.02118 | 0.03429 | 0.00125 | -0.0383 | 0.00614 | DLPFC, ACC |
| 1181  | Bipolar | Bipolar I +P; ODC; OAR                  | BP+P | Morphine overdose      | Accidental | M | 28 | W | 27.4 | 6.2 | 8.5, 7.0 | N | Y | N | Y | Y | N | 111 | 0.02154 | 0.03256 | 0.00585 | -0.0112 | -0.0072 | DLPFC, ACC |
| 1244  | Bipolar | Bipolar I +P; AAR; ODC; OAC             | BP+P | Asphyxiation           | Accidental | M | 52 | W | 23.5 | 6.7 | 8.6, 7.6 | N | Y | Y | Y | Y | N | 101 | 0.02102 | 0.03259 | 0.00659 | -0.0334 | -0.0059 | DLPFC, ACC |
| 10006 | Bipolar | Bipolar I +P; ADR                       | BP+P | Gunshot wound          | Suicide    | F | 55 | W | 17.5 | 6.4 | 7.8, 7.8 | Y | Y | N | N | N | N | 107 | 0.02153 | 0.03459 | -0.0033 | -0.0178 | 0.02199 | DLPFC, ACC |
| 716   | Bipolar | Bipolar I; ADC; OAC                     | BP-P | Gunshot wound          | Suicide    | M | 58 | W | 27.7 | 6.8 | 7.8, 7.6 | Y | U | N | N | N | N | 186 | 0.02201 | 0.02697 | 0.0081  | -0.0097 | 0.01403 | DLPFC, ACC |
| 849   | Bipolar | Bipolar II                              | BP-P | Alprazolam overdose    | Suicide    | M | 52 | W | 22.1 | 7.3 | 7.7, 7.1 | Y | N | N | N | Y | N | 163 | 0.0198  | -0.0041 | 0.00262 | 0.07023 | -0.0052 | DLPFC, ACC |
| 886   | Bipolar | Bipolar I; ADC                          | BP-P | Gunshot wound          | Suicide    | M | 45 | W | 27.2 | 7.1 | 8.4, 7.0 | Y | Y | N | N | N | N | 155 | 0.02114 | 0.02538 | 0.00368 | -0.0052 | 0.01764 | DLPFC, ACC |
| 945   | Bipolar | Bipolar I; AAC                          | BP-P | Asphyxiation           | Suicide    | F | 43 | W | 31.9 | 6.7 | 7.8, 7.0 | Y | Y | Y | Y | Y | N | 142 | 0.01904 | -0.0743 | 0.00942 | -0.0652 | 0.02532 | DLPFC, ACC |



|       |         |                                 |      |                        |              |   |    |   |      |     |          |   |   |   |   |   |   |     |         |         |         |         |         |            |
|-------|---------|---------------------------------|------|------------------------|--------------|---|----|---|------|-----|----------|---|---|---|---|---|---|-----|---------|---------|---------|---------|---------|------------|
| 957   | Bipolar | Bipolar I                       | BP-P | Drowning               | Suicide      | F | 39 | W | 22.2 | 6.7 | 8.6      | Y | U | N | Y | N | N | 139 | 0.02102 | 0.02444 | -0.0023 | -0.0404 | -0.0148 | DLPFC      |
| 982   | Bipolar | Bipolar II; ADR                 | BP-P | Smoke inhalation       | Accidental   | M | 79 | W | 31.1 | 6.7 | 8.4, 7.1 | N | Y | N | Y | Y | N | 138 | 0.02033 | 0.01479 | 0.00098 | 0.02082 | 0.02201 | DLPFC, ACC |
| 1069  | Bipolar | Bipolar I; AAR                  | BP-P | Cardiovascular disease | Natural      | M | 48 | W | 18.1 | 6.9 | 8.4, 8.2 | N | N | N | N | N | N | 123 | 0.0214  | 0.0282  | 0.00476 | -0.01   | 0.02087 | DLPFC, ACC |
| 1102  | Bipolar | Bipolar NOS; ADR; ODC; OAC; OAR | BP-P | Cardiovascular disease | Natural      | M | 50 | W | 12.1 | 6.7 | 8.3, 7.2 | N | Y | N | Y | Y | N | 119 | 0.02116 | 0.01131 | 0.00654 | 0.02866 | 0.00972 | DLPFC, ACC |
| 1207  | Bipolar | Bipolar NOS; ADC; ODC           | BP-P | Cardiovascular disease | Natural      | M | 48 | W | 18.0 | 6.4 | 9.2, 8.1 | N | U | Y | Y | Y | N | 109 | 0.02108 | 0.03338 | -0.0034 | -0.002  | 0.01331 | DLPFC, ACC |
| 1328  | Bipolar | Bipolar NOS                     | BP-P | Cardiovascular disease | Natural      | F | 49 | W | 21.5 | 6.7 | 8.4, 8.2 | N | N | N | Y | Y | Y | 87  | 0.02115 | 0.02952 | -0.0008 | -0.022  | 0.01749 | DLPFC, ACC |
| 1449  | Bipolar | Bipolar II                      | BP-P | Cardiovascular disease | Natural      | F | 57 | W | 19.1 | 6.4 | 7.9, 7.5 | N | Y | N | Y | N | N | 68  | 0.02187 | 0.03511 | 0.00421 | -0.0249 | 0.01234 | DLPFC, ACC |
| 1461  | Bipolar | Bipolar I; AAR                  | BP-P | Cardiovascular disease | Natural      | M | 57 | W | 7.6  | 6.8 | 8.3      | N | N | Y | Y | N | N | 66  | 0.02162 | 0.0285  | 0.00248 | -0.011  | 0.00199 | DLPFC      |
| 1473  | Bipolar | Bipolar II; AAC                 | BP-P | Electrocution          | Accidental   | M | 51 | W | 22.3 | 6.6 | 8.3, 8.3 | N | U | N | Y | N | N | 64  | 0.02003 | -0.0052 | 0.00169 | 0.01655 | -0.0225 | DLPFC, ACC |
| 1483  | Bipolar | Bipolar II; ADC; OAC            | BP-P | Chronic alcoholism     | Natural      | F | 56 | W | 5.8  | 6.0 | 7.5, 6.1 | N | N | N | N | N | N | 62  | 0.02142 | 0.02537 | 0.00289 | -0.0246 | -0.0061 | DLPFC, ACC |
| 1537  | Bipolar | Bipolar II; ADR                 | BP-P | Pulmonary emboli       | Natural      | F | 52 | W | 21.1 | 6.8 | 8.4, 8.3 | N | Y | N | Y | Y | N | 51  | 0.02069 | 0.02542 | -0.0006 | -0.0029 | -0.0104 | DLPFC, ACC |
| 1565  | Bipolar | Bipolar NOS; ADC                | BP-P | Cardiovascular disease | Natural      | M | 45 | W | 27.6 | 6.8 | 8.4, 8.1 | N | Y | Y | Y | N | N | 46  | 0.02127 | 0.02917 | 0.00199 | -0.0323 | 0.00968 | DLPFC, ACC |
| 1573  | Bipolar | Bipolar II                      | BP-P | Status asthmaticus     | Natural      | F | 27 | W | 11.2 | 6.7 | 8.8, 8.9 | N | N | N | N | N | N | 45  | 0.02161 | 0.02421 | 0.00067 | -0.0153 | 0.02653 | DLPFC, ACC |
| 1584  | Bipolar | Bipolar I; ODC; ODR             | BP-P | Oxymorphone overdose   | Suicide      | M | 46 | W | 16.6 | 6.8 | 7.7, 5.8 | Y | Y | N | Y | Y | Y | 43  | 0.0216  | 0.03223 | 0.00761 | -0.0015 | 0.00502 | DLPFC, ACC |
| 1589  | Bipolar | Bipolar NOS; ADC; ODC; OAC      | BP-P | Combined drug overdose | Accidental   | F | 25 | W | 27.6 | 6.1 | 6.7, 5.7 | N | Y | Y | Y | N | N | 42  | 0.0205  | 0.02027 | 0.00122 | 0.02699 | 0.00912 | DLPFC, ACC |
| 1603  | Bipolar | Bipolar I; ADC; ODC             | BP-P | Asphyxiation           | Suicide      | M | 31 | W | 12.0 | 6.8 | 8.9, 8.8 | Y | Y | N | Y | N | N | 40  | 0.02168 | 0.02112 | 0.00425 | 0.0517  | 0.00069 | DLPFC, ACC |
| 1632  | Bipolar | Bipolar II; ODC                 | BP-P | Undetermined           | Undetermined | F | 31 | B | 19.1 | 6.6 | 8.4, 7.8 | U | N | N | N | N | N | 35  | -0.0823 | 0.00074 | 0.02105 | 0.0017  | -0.0163 | DLPFC, ACC |
| 1695  | Bipolar | Bipolar I; ADR; ODC; OAR        | BP-P | Combined drug overdose | Accidental   | M | 33 | W | 29.1 | 6.8 | 8.7, 6.7 | N | Y | Y | N | Y | N | 24  | 0.02088 | 0.02633 | 0.00561 | 0.00166 | 0.01109 | DLPFC, ACC |
| 10004 | Bipolar | Bipolar I; ODC                  | BP-P | Combined drug overdose | Accidental   | F | 50 | W | 11.7 | 6.4 | 8.4, 8.5 | N | U | Y | N | N | N | 108 | 0.02145 | 0.03044 | 0.00762 | -0.013  | 0.00688 | DLPFC, ACC |
| 10014 | Bipolar | Bipolar NOS; ADC; ODC           | BP-P | Gunshot wound          | Suicide      | M | 24 | W | 23.1 | 6.1 | 8.6, 7.6 | Y | Y | N | N | N | N | 108 | 0.02167 | 0.03029 | 0.00708 | -0.0127 | 0.00593 | DLPFC, ACC |

Header abbreviations: DX, diagnostic category; DSM DX, Diagnostic Statistical Manual IV diagnosis; 2' DX, diagnosis based on symptom stratification; PMI, postmortem interval (hours); RIN, RNA integrity number (first value is from DLPFC if both brain regions were use); Smoke, tobacco use at time of death; APD, antipsychotic drugs at time of death; AD, antidepressants at time of death; Benz/VPA- benzodiazapine/valproic acid at time of death; Lithium-lithium at time of death; Storage time (months) at -80C; A1-A5- genetic ancestry related components; QC/PCA, RNAseq quality control/principal component analysis

Other abbreviations: ATOD, at time of death; ADC, alcohol dependence, current at time of death; ADR, alcohol dependence, in remission at time of death; AAC, alcohol abuse, current at time of death; AAR, alcohol abuse, in remission at time of death; ODC, other substance dependence, current at time of death; ODR, other substance dependence, in remission at time of death; OAC, other substance abuse, current at time of death; OAR, other substance abuse, in remission at time of death; U, unknown
