# Supplementary material
Source: PubMed Central journal article supplement (PMC8379536)
Supplement: sbaa195_suppl_supplementary_table_2.pdf [file sbaa195_suppl_supplementary_table_2.pdf]

**Supplementary Table 2. Top DEGs with lower and higher expression in SCZ in the DLPFC**

| ENSEMBL ID       | Gene symbol | Gene name                                                        | % change SCZ | qvalue   | ENSEMBL ID       | Gene symbol | Gene name                                                 | % change SCZ | qvalue   |
|------------------|-------------|------------------------------------------------------------------|--------------|----------|------------------|-------------|-----------------------------------------------------------|--------------|----------|
| ENSG00000242258  | LINC00996   | long non-coding RNA 996                                          | -68.4        | 9.83E-06 | ENSG00000163220  | S100A9      | S100 calcium binding protein A9                           | 179.8        | 1.18E-04 |
| ENSG00000132744  | ACY3        | aminoacylase 3                                                   | -53.6        | 6.92E-04 | ENSG00000184557  | SOCS3       | suppressor of cytokine signaling 3                        | 156.8        | 1.97E-03 |
| ENSG00000260599  | AC011467.1  | long non-coding RNA                                              | -46.3        | 1.49E-04 | ENSG00000047457  | CP          | ceruloplasmin                                             | 133.1        | 7.83E-06 |
| ENSG00000136297  | MMD2        | monocyte to macrophage differentiation associated 2              | -44.7        | 5.68E-06 | ENSG00000018280  | SLC11A1     | solute carrier family 11 member 1                         | 106.6        | 4.69E-05 |
| ENSG00000111404  | RERGL       | RERG like                                                        | -43.6        | 4.69E-05 | ENSG00000115604  | IL18R1      | interleukin 18 receptor 1                                 | 98.3         | 2.19E-03 |
| ENSG00000019186  | CYP24A1     | cytochrome P450 family 24 subfamily A member 1                   | -42.2        | 3.15E-03 | ENSG00000171051  | FPR1        | formyl peptide receptor 1                                 | 98.2         | 1.32E-03 |
| ENSG00000269138  | ZNF209P     | unprocessed pseudogene ZNF209                                    | -41.4        | 9.83E-06 | ENSG00000026508  | CD44        | CD44 molecule (Indian blood group)                        | 91.5         | 4.86E-05 |
| ENSG00000215380  | AC090625.1  | processed pseudogene                                             | -40.5        | 1.97E-03 | ENSG00000185201  | IFITM2      | interferon induced transmembrane protein 2                | 84.9         | 1.88E-04 |
| ENSG00000101306  | MYLK2       | myosin light chain kinase 2                                      | -39.5        | 7.72E-05 | ENSG00000096060  | FKBP5       | FKBP prolyl isomerase 5                                   | 82.4         | 4.90E-06 |
| ENSG00000197238  | HIST1H4J    | histone cluster 1 H4 family member j                             | -39.0        | 3.03E-02 | ENSG00000197249  | SERPINA1    | serpin family A member 1                                  | 82.3         | 1.32E-03 |
| ENSG00000121858  | TNFSF10     | TNF superfamily member 10                                        | -38.4        | 6.79E-04 | ENSG00000177575  | CD163       | CD163 molecule                                            | 79.3         | 4.91E-03 |
| ENSG00000141485  | SLC13A5     | solute carrier family 13 member 5                                | -38.0        | 1.77E-05 | ENSG00000102287  | GABRE       | gamma-aminobutyric acid type A receptor epsilon subunit   | 77.2         | 5.68E-06 |
| ENSG00000157005  | SST         | somatostatin                                                     | -37.8        | 3.84E-03 | ENSG00000148926  | ADM         | adrenomedullin                                            | 75.9         | 4.70E-03 |
| ENSG00000207933  | MIR9-1      | microRNA 9-1                                                     | -37.7        | 2.80E-02 | ENSG00000106211  | HSPB1       | heat shock protein family B (small) member 1              | 74.3         | 9.26E-04 |
| ENSG00000163815  | CLEC3B      | C-type lectin domain family 3 member B                           | -37.0        | 1.15E-04 | ENSG00000115594  | IL1R1       | interleukin 1 receptor type 1                             | 74.0         | 2.12E-06 |
| ENSG00000122223  | CD244       | CD244 molecule                                                   | -36.9        | 5.72E-04 | ENSG00000213088  | ACKR1       | atypical chemokine receptor 1 (Duffy blood group)         | 73.7         | 1.86E-04 |
| ENSG00000109255  | NMU         | neuromedin U                                                     | -35.9        | 3.03E-05 | ENSG00000173530  | TNFRSF10D   | TNF receptor superfamily member 10d                       | 73.0         | 1.86E-04 |
| ENSG00000154930  | ACSS1       | acyl-CoA synthetase short chain family member 1                  | -35.3        | 2.01E-05 | ENSG00000187193  | MT1X        | metallothionein 1X                                        | 73.0         | 2.16E-04 |
| ENSG00000080573  | COL5A3      | collagen type V alpha 3 chain                                    | -35.1        | 3.58E-05 | ENSG00000060138  | YBX3        | Y-box binding protein 3                                   | 72.4         | 2.72E-05 |
| ENSG00000163395  | IGFN1       | immunoglobulin like and fibronectin type III domain containing 1 | -35.0        | 3.79E-02 | ENSG00000090339  | ICAM1       | intercellular adhesion molecule 1                         | 72.0         | 6.83E-04 |
| ENSG00000139329  | LUM         | lumican                                                          | -34.9        | 1.18E-04 | ENSG00000077238  | IL4R        | interleukin 4 receptor                                    | 71.2         | 2.85E-05 |
| ENSG00000164600  | NEUROD6     | neuronal differentiation 6                                       | -34.7        | 8.75E-07 | ENSG00000142089  | IFITM3      | interferon induced transmembrane protein 3                | 68.9         | 3.17E-04 |
| ENSG00000168329  | CX3CR1      | C-X3-C motif chemokine receptor 1                                | -34.7        | 3.49E-02 | ENSG00000167772  | ANGPTL4     | angiopoietin like 4                                       | 67.4         | 1.15E-03 |
| ENSG00000197992  | CLEC9A      | C-type lectin domain containing 9A                               | -34.4        | 2.16E-02 | ENSG00000133048  | CHI3L1      | chitinase 3 like 1                                        | 66.2         | 3.59E-03 |
| ENSG00000133433  | GSTT2B      | glutathione S-transferase theta 2B (gene/pseudogene)             | -34.3        | 1.33E-02 | ENSG00000196616  | ADH1B       | alcohol dehydrogenase 1B (class I), beta polypeptide      | 65.0         | 1.47E-03 |
| ENSG00000255980  | AP000439.2  | uncharacterized LOC102724265                                     | -34.3        | 3.48E-02 | ENSG00000202566  | MIR421      | microRNA 421                                              | 64.5         | 9.28E-04 |
| ENSG00000273542  | HIST1H4K    | histone cluster 1 H4 family member k                             | -34.2        | 4.18E-02 | ENSG00000145623  | OSMR        | oncostatin M receptor                                     | 63.3         | 3.64E-06 |
| ENSG00000169562  | GJB1        | gap junction protein beta 1                                      | -34.1        | 3.55E-04 | ENSG00000124762  | CDKN1A      | cyclin dependent kinase inhibitor 1A                      | 62.2         | 4.74E-03 |
| ENSG00000261325  | LINC02192   | long non-coding RNA 2192                                         | -34.0        | 1.86E-04 | ENSG00000001617  | SEMA3F      | semaphorin 3F                                             | 60.9         | 3.51E-06 |
| ENSG00000236008  | LINC01814   | long non-coding RNA 1814                                         | -33.9        | 2.66E-03 | ENSG00000128016  | ZFP36       | ZFP36 ring finger protein                                 | 60.6         | 3.04E-02 |
| ENSG00000147571  | CRH         | corticotropin releasing hormone                                  | -33.6        | 1.29E-03 | ENSG00000149573  | MPZL2       | myelin protein zero like 2                                | 60.4         | 7.05E-03 |
| ENSG00000210195  | MT-TT       | mitochondrial transfer RNA TT                                    | -33.0        | 2.93E-02 | ENSG00000102265  | TIMP1       | TIMP metalloproteinase inhibitor 1                        | 60.2         | 3.67E-04 |
| ENSG00000179178  | TMEM125     | transmembrane protein 125                                        | -33.0        | 1.33E-03 | ENSG00000125810  | CD93        | CD93 molecule                                             | 59.8         | 1.76E-03 |
| ENSG00000186081  | KRT5        | keratin 5                                                        | -32.6        | 3.90E-04 | ENSG00000151929  | BAG3        | BCL2 associated athanogene 3                              | 59.8         | 4.25E-04 |
| ENSG00000118777  | ABCG2       | ATP binding cassette subfamily G member 2 (Junior blood group)   | -32.4        | 4.90E-06 | ENSG00000101276  | SLC52A3     | solute carrier family 52 member 3                         | 59.2         | 1.22E-03 |
| ENSG00000231252  | AC099792.1  | long non-coding RNA                                              | -32.3        | 2.60E-05 | ENSG00000241158  | ADAMTS9-AS1 | ADAMTS9 antisense 1                                       | 59.1         | 3.61E-05 |
| ENSG00000227544  | AC018647.1  | long non-coding RNA                                              | -32.1        | 7.01E-05 | ENSG00000260337  | AC091544.4  | long non-coding RNA                                       | 58.8         | 1.14E-03 |
| ENSG00000238243  | OR2W3       | olfactory receptor family 2 subfamily W member 3                 | -32.1        | 1.04E-02 | ENSG00000134531  | EMP1        | epithelial membrane protein 1                             | 58.7         | 4.91E-03 |
| ENSG000000086159 | AQP6        | aquaporin 6                                                      | -32.0        | 6.31E-06 | ENSG00000203747  | FCGR3A      | Fc fragment of IgG receptor IIIa                          | 58.7         | 1.58E-02 |
| ENSG00000254081  | LINC01299   | long non-coding RNA 1299                                         | -31.9        | 1.12E-02 | ENSG000000087116 | ADAMTS2     | ADAM metalloproteinase with thrombospondin type 1 motif 2 | 58.6         | 1.34E-05 |
| ENSG00000128606  | LRRC17      | leucine rich repeat containing 17                                | -31.9        | 3.51E-06 | ENSG00000155659  | VSIG4       | V-set and immunoglobulin domain containing 4              | 58.5         | 2.73E-02 |

|                 |            |                                                          |       |          |                 |            |                                                            |      |          |
|-----------------|------------|----------------------------------------------------------|-------|----------|-----------------|------------|------------------------------------------------------------|------|----------|
| ENSG00000271824 | SMIM32     | small integral membrane protein 32                       | -31.2 | 2.66E-03 | ENSG00000224431 | AC063976.2 | processed pseudogene                                       | 58.2 | 1.19E-03 |
| ENSG00000017483 | SLC38A5    | solute carrier family 38 member 5                        | -31.1 | 4.86E-04 | ENSG00000127954 | STEAP4     | STEAP4 metalloreductase                                    | 57.6 | 2.08E-04 |
| ENSG00000117594 | HSD11B1    | hydroxysteroid 11-beta dehydrogenase 1                   | -31.0 | 5.47E-04 | ENSG00000136011 | STAB2      | stabilin 2                                                 | 57.5 | 8.38E-04 |
| ENSG00000177133 | PRDM16-DT  | long non-coding RNA PRDM16-DT                            | -30.8 | 2.47E-03 | ENSG00000150337 | FCGR1A     | Fc fragment of IgG receptor Ia                             | 57.0 | 1.15E-02 |
| ENSG00000004468 | CD38       | CD38 molecule                                            | -30.4 | 2.20E-04 | ENSG00000137462 | TLR2       | toll like receptor 2                                       | 56.8 | 4.18E-04 |
| ENSG00000107821 | KAZALD1    | Kazal type serine peptidase inhibitor domain 1           | -30.2 | 1.32E-04 | ENSG00000136872 | ALDOB      | aldolase, fructose-bisphosphate B                          | 56.7 | 5.24E-05 |
| ENSG00000127472 | PLA2G5     | phospholipase A2 group V                                 | -30.1 | 2.63E-03 | ENSG00000178726 | THBD       | thrombomodulin                                             | 56.5 | 9.83E-04 |
| ENSG00000086717 | PPEF1      | protein phosphatase with EF-hand domain 1                | -29.8 | 4.90E-06 | ENSG00000143226 | FCGR2A     | Fc fragment of IgG receptor IIa                            | 56.1 | 6.27E-03 |
| ENSG00000188729 | OSTN       | osteonin                                                 | -29.2 | 1.16E-02 | ENSG00000137801 | THBS1      | thrombospondin 1                                           | 55.9 | 2.63E-04 |
| ENSG00000120875 | DUSP4      | dual specificity phosphatase 4                           | -28.8 | 2.03E-02 | ENSG00000249717 | AC110760.2 | long non-coding RNA                                        | 55.0 | 2.36E-03 |
| ENSG00000255004 | AL133330.2 | long non-coding RNA                                      | -28.7 | 7.74E-03 | ENSG00000099860 | GADD45B    | growth arrest and DNA damage inducible beta                | 54.8 | 1.08E-02 |
| ENSG00000172987 | HPSE2      | heparanase 2 (inactive)                                  | -28.6 | 5.37E-05 | ENSG00000149257 | SERPINH1   | serpin family H member 1                                   | 53.0 | 1.18E-02 |
| ENSG00000118729 | CASQ2      | calsequestrin 2                                          | -28.5 | 7.19E-03 | ENSG00000259690 | AC107980.1 | long non-coding RNA                                        | 52.7 | 3.43E-03 |
| ENSG00000196862 | RGPD4      | RANBP2 like and GRIP domain containing 4                 | -28.3 | 4.57E-03 | ENSG00000279099 | AC090740.1 | not named                                                  | 52.5 | 2.59E-03 |
| ENSG00000159958 | TNFRSF13C  | TNF receptor superfamily member 13C                      | -28.2 | 1.29E-02 | ENSG00000198959 | TGM2       | transglutaminase 2                                         | 52.5 | 1.16E-04 |
| ENSG00000204603 | LINC01257  | long non-coding RNA 1257                                 | -28.1 | 2.51E-03 | ENSG00000257335 | MGAM       | maltase-glucoamylase                                       | 52.4 | 2.73E-03 |
| ENSG00000197360 | ZNF98      | zinc finger protein 98                                   | -28.0 | 4.01E-05 | ENSG00000203987 | AL772363.1 | long non-coding RNA                                        | 52.0 | 7.26E-03 |
| ENSG00000068976 | PYGM       | glycogen phosphorylase, muscle associated                | -27.9 | 1.36E-03 | ENSG00000137507 | LRR32      | leucine rich repeat containing 32                          | 51.4 | 2.76E-04 |
| ENSG00000154330 | PGM5       | phosphoglucomutase 5                                     | -27.9 | 7.15E-05 | ENSG00000223401 | NA         | not named                                                  | 51.3 | 1.12E-03 |
| ENSG00000091513 | TF         | transferrin                                              | -27.9 | 6.81E-04 | ENSG00000135245 | HILPDA     | hypoxia inducible lipid droplet associated                 | 51.3 | 2.82E-03 |
| ENSG00000006128 | TAC1       | tachykinin precursor 1                                   | -27.9 | 8.66E-04 | ENSG00000186567 | CEACAM19   | carcinoembryonic antigen related cell adhesion molecule 19 | 51.0 | 7.45E-04 |
| ENSG00000086506 | HBQ1       | hemoglobin subunit theta 1                               | -27.9 | 6.27E-03 | ENSG00000168404 | MLKL       | mixed lineage kinase domain like pseudokinase              | 50.8 | 1.14E-03 |
| ENSG00000197430 | OPALIN     | oligodendrocytic myelin paranodal and inner loop protein | -27.8 | 4.89E-03 | ENSG00000221869 | CEBPD      | CCAAT enhancer binding protein delta                       | 50.1 | 7.61E-03 |
| ENSG00000185269 | NOTUM      | notum, palmitoleoyl-protein carboxylesterase             | -27.8 | 9.59E-03 | ENSG00000275395 | FCGBP      | Fc fragment of IgG binding protein                         | 50.0 | 2.73E-02 |
| ENSG00000186891 | TNFRSF18   | TNF receptor superfamily member 18                       | -27.5 | 2.35E-02 | ENSG00000101187 | SLCO4A1    | solute carrier organic anion transporter family member 4A1 | 49.8 | 3.54E-04 |
| ENSG00000249436 | AC008780.1 | long non-coding RNA                                      | -27.5 | 9.56E-04 | ENSG00000125148 | MT2A       | metallothionein 2A                                         | 49.2 | 4.85E-03 |
| ENSG00000129538 | RNASE1     | ribonuclease A family member 1, pancreatic               | -27.5 | 1.56E-03 | ENSG00000227188 | MGAT3-AS1  | MGAT3 antisense 1                                          | 48.7 | 1.73E-03 |
