# Supplementary material
Source: PubMed Central journal article supplement (PMC8379536)
Supplement: sbaa195_suppl_supplementary_table_3.pdf [file sbaa195_suppl_supplementary_table_3.pdf]

**Supplementary Table 3. Top DEGs with lower and higher expression in SCZ in the ACC**

| ENSEMBL ID      | Gene symbol | Gene name                                                        | % change SCZ | qvalue   | ENSEMBL ID       | Gene symbol | Gene name                                                 | % change SCZ | qvalue   |
|-----------------|-------------|------------------------------------------------------------------|--------------|----------|------------------|-------------|-----------------------------------------------------------|--------------|----------|
| ENSG00000132744 | ACY3        | aminoacylase 3                                                   | -56.9        | 3.58E-06 | ENSG00000163220  | S100A9      | S100 calcium binding protein A9                           | 176.3        | 2.28E-05 |
| ENSG00000107821 | KAZALD1     | Kazal type serine peptidase inhibitor domain 1                   | -36.8        | 3.97E-08 | ENSG00000184557  | SOCS3       | suppressor of cytokine signaling 3                        | 125.9        | 3.09E-03 |
| ENSG00000197921 | HES5        | hes family bHLH transcription factor 5                           | -34.5        | 2.51E-04 | ENSG00000047457  | CP          | ceruloplasmin                                             | 105.9        | 2.28E-05 |
| ENSG00000017483 | SLC38A5     | solute carrier family 38 member 5                                | -33.0        | 1.00E-06 | ENSG00000254423  | AC087203.1  | processed pseudogene                                      | 82.3         | 1.62E-02 |
| ENSG00000068976 | PYGM        | glycogen phosphorylase, muscle associated                        | -30.0        | 3.23E-06 | ENSG00000026508  | CD44        | CD44 molecule (Indian blood group)                        | 76.9         | 8.94E-05 |
| ENSG00000272944 | AC079834.2  | long non-coding RNA                                              | -29.3        | 1.78E-08 | ENSG00000133048  | CHI3L1      | chitinase 3 like 1                                        | 73.0         | 3.11E-04 |
| ENSG00000157734 | SNX22       | sorting nexin 22                                                 | -27.7        | 8.94E-07 | ENSG00000018280  | SLC11A1     | solute carrier family 11 member 1                         | 69.5         | 1.27E-03 |
| ENSG00000049089 | COL9A2      | collagen type IX alpha 2 chain                                   | -26.7        | 1.14E-05 | ENSG00000087116  | ADAMTS2     | ADAM metalloproteinase with thrombospondin type 1 motif 2 | 67.4         | 3.08E-08 |
| ENSG00000068078 | FGFR3       | fibroblast growth factor receptor 3                              | -25.4        | 2.99E-05 | ENSG00000174226  | SNX31       | sorting nexin 31                                          | 64.4         | 1.27E-04 |
| ENSG00000205704 | LINC00634   | long non-coding RNA 634                                          | -25.3        | 1.77E-06 | ENSG00000187193  | MT1X        | metallothionein 1X                                        | 62.8         | 6.77E-04 |
| ENSG00000167614 | TTYH1       | tweety family member 1                                           | -19.5        | 2.58E-05 | ENSG00000246422  | AC008781.2  | long non-coding RNA                                       | 62.7         | 4.07E-05 |
| ENSG00000106089 | STX1A       | syntaxin 1A                                                      | -18.2        | 1.41E-05 | ENSG00000096060  | FKBP5       | FKBP prolyl isomerase 5                                   | 62.6         | 3.52E-04 |
| ENSG00000144040 | SFXN5       | sideroflexin 5                                                   | -18.1        | 1.91E-05 | ENSG00000127954  | STEAP4      | STEAP4 metalloredutase                                    | 62.1         | 8.94E-07 |
| ENSG00000154764 | WNT7A       | Wnt family member 7A                                             | -15.6        | 3.85E-04 | ENSG00000255556  | AC087203.2  | processed pseudogene                                      | 61.3         | 3.13E-02 |
| ENSG00000213846 | NA          | not named                                                        | -14.4        | 4.33E-02 | ENSG00000242296  | DEFB109A    | unprocessed pseudogene                                    | 61.2         | 2.43E-03 |
| ENSG00000100360 | IFT27       | intraflagellar transport 27                                      | -14.3        | 4.07E-05 | ENSG00000243415  | AC107021.1  | long non-coding RNA                                       | 59.6         | 9.75E-06 |
| ENSG00000115604 | IL18R1      | interleukin 18 receptor 1                                        | 55.3         | 2.48E-02 | ENSG00000136872  | ALDOB       | aldolase, fructose-bisphosphate B                         | 58.6         | 5.68E-06 |
| ENSG00000127954 | STEAP4      | STEAP4 metalloredutase                                           | 62.1         | 8.94E-07 | ENSG00000148926  | ADM         | adrenomedullin                                            | 57.5         | 1.08E-02 |
| ENSG00000242258 | LINC00996   | long non-coding RNA 996                                          | -65.0        | 9.29E-07 | ENSG00000069206  | ADAM7       | ADAM metalloproteinase domain 7                           | 57.4         | 1.02E-04 |
| ENSG00000163395 | IGFN1       | immunoglobulin like and fibronectin type III domain containing 1 | -49.9        | 8.80E-05 | ENSG00000224431  | AC063976.2  | processed pseudogene                                      | 55.9         | 1.33E-04 |
| ENSG00000255980 | AP000439.2  | uncharacterized LOC102724265                                     | -48.9        | 1.27E-04 | ENSG00000280286  | FRG1KP      | unprocessed pseudogene                                    | 55.4         | 1.74E-04 |
| ENSG00000157303 | SUSD3       | sushi domain containing 3                                        | -47.6        | 4.15E-05 | ENSG00000115604  | IL18R1      | interleukin 18 receptor 1                                 | 55.3         | 2.48E-02 |
| ENSG00000168329 | CX3CR1      | C-X3-C motif chemokine receptor 1                                | -46.4        | 4.41E-04 | ENSG00000151929  | BAG3        | BCL2 associated athanogene 3                              | 55.2         | 3.14E-04 |
| ENSG00000197992 | CLEC9A      | C-type lectin domain containing 9A                               | -43.9        | 6.26E-04 | ENSG00000060138  | YBX3        | Y-box binding protein 3                                   | 54.7         | 4.31E-04 |
| ENSG00000109255 | NMU         | neuromedin U                                                     | -43.8        | 3.25E-06 | ENSG00000258667  | HIF1A-AS3   | HIF1A antisense RNA 3                                     | 54.5         | 2.57E-05 |
| ENSG00000136297 | MMD2        | monocyte to macrophage differentiation associated 2              | -42.8        | 7.38E-08 | ENSG00000167772  | ANGPTL4     | angiopoietin like 4                                       | 54.3         | 9.29E-04 |
| ENSG00000261325 | LINC02192   | long non-coding RNA 2192                                         | -42.6        | 1.23E-06 | ENSG00000145623  | OSMR        | oncostatin M receptor                                     | 53.1         | 9.85E-06 |
| ENSG00000111404 | RERGL       | RERG like                                                        | -42.6        | 2.92E-06 | ENSG00000133742  | CA1         | carbonic anhydrase 1                                      | 53.1         | 4.53E-05 |
| ENSG00000110876 | SELPLG      | selectin P ligand                                                | -42.0        | 1.27E-04 | ENSG00000261051  | AC107021.2  | long non-coding RNA                                       | 53.1         | 2.30E-04 |
| ENSG00000101306 | MYLK2       | myosin light chain kinase 2                                      | -40.6        | 1.77E-06 | ENSG00000279702  | AL356266.1  | not named                                                 | 52.9         | 2.20E-04 |
| ENSG00000228058 | LINC01736   | long non-coding RNA 1736                                         | -40.4        | 3.91E-03 | ENSG000000267934 | AC010300.1  | long non-coding RNA                                       | 52.9         | 6.60E-05 |
| ENSG00000157005 | SST         | somatostatin                                                     | -39.5        | 6.63E-04 | ENSG00000200680  | SNORD115-4  | snoRNA 115-4                                              | 52.8         | 2.54E-02 |
| ENSG00000123358 | NR4A1       | nuclear receptor subfamily 4 group A member 1                    | -38.8        | 4.70E-04 | ENSG00000279099  | AC090740.1  | not named                                                 | 52.5         | 2.01E-04 |
| ENSG00000159958 | TNFRSF13C   | TNF receptor superfamily member 13C                              | -38.2        | 2.99E-05 | ENSG00000171051  | FPR1        | formyl peptide receptor 1                                 | 52.4         | 3.11E-02 |
| ENSG00000080573 | COL5A3      | collagen type V alpha 3 chain                                    | -38.2        | 3.10E-08 | ENSG00000115594  | IL1R1       | interleukin 1 receptor type 1                             | 52.3         | 2.63E-04 |
| ENSG00000186081 | KRT5        | keratin 5                                                        | -38.2        | 8.48E-05 | ENSG00000136011  | STAB2       | stabilin 2                                                | 51.7         | 2.26E-04 |
| ENSG00000186891 | TNFRSF18    | TNF receptor superfamily member 18                               | -37.4        | 1.77E-04 | ENSG00000236576  | AC241520.1  | processed pseudogene                                      | 51.7         | 1.01E-04 |
| ENSG00000019186 | CYP24A1     | cytochrome P450 family 24 subfamily A member 1                   | -37.0        | 1.33E-03 | ENSG00000261668  | AC093591.2  | long non-coding RNA                                       | 51.6         | 1.49E-05 |
| ENSG00000172987 | HPSE2       | heparanase 2 (inactive)                                          | -36.8        | 1.77E-06 | ENSG00000239828  | AC063944.1  | long non-coding RNA                                       | 51.3         | 1.49E-05 |
| ENSG00000271824 | SMIM32      | small integral membrane protein 32                               | -36.3        | 6.42E-05 | ENSG00000170379  | TCAF2       | TRPM8 channel associated factor 2                         | 50.6         | 4.64E-05 |
| ENSG00000140678 | ITGAX       | integrin subunit alpha X                                         | -35.3        | 3.11E-05 | ENSG00000173530  | TNFRSF10D   | TNF receptor superfamily member 10d                       | 50.1         | 1.80E-03 |
| ENSG00000241945 | PWP2        | PWP2 small subunit processome component                          | -35.1        | 1.80E-01 | ENSG00000270523  | NA          | not named                                                 | 50.1         | 6.74E-03 |

|                 |            |                                                                |       |          |                 |              |                                             |      |          |
|-----------------|------------|----------------------------------------------------------------|-------|----------|-----------------|--------------|---------------------------------------------|------|----------|
| ENSG00000214776 | AC092821.1 | transcribed unprocessed pseudogene                             | -35.0 | 4.13E-01 | ENSG00000260551 | PWRN2        | long non-coding RNA PWRN2                   | 50.0 | 1.37E-02 |
| ENSG00000164488 | DACT2      | dishevelled binding antagonist of beta catenin 2               | -34.6 | 3.01E-04 | ENSG00000256274 | TAS2R64P     | transcribed unprocessed pseudogene TAS2R64P | 50.0 | 1.30E-02 |
| ENSG00000141485 | SLC13A5    | solute carrier family 13 member 5                              | -34.0 | 1.77E-06 | ENSG00000137462 | TLR2         | toll like receptor 2                        | 49.8 | 6.77E-04 |
| ENSG00000121858 | TNFSF10    | TNF superfamily member 10                                      | -34.0 | 8.62E-04 | ENSG00000279050 | PWAR1        | PWAR1                                       | 49.6 | 7.28E-06 |
| ENSG00000154930 | ACSS1      | acyl-CoA synthetase short chain family member 1                | -33.5 | 4.43E-07 | ENSG00000283281 | MIR7978      | microRNA 7978                               | 49.4 | 6.72E-04 |
| ENSG00000179178 | TMEM125    | transmembrane protein 125                                      | -33.4 | 1.99E-03 | ENSG00000257894 | AC027288.3   | long non-coding RNA                         | 49.0 | 3.01E-04 |
| ENSG00000169562 | GJB1       | gap junction protein beta 1                                    | -33.3 | 2.57E-03 | ENSG00000236295 | AC007557.3   | long non-coding RNA                         | 48.9 | 1.07E-03 |
| ENSG00000122223 | CD244      | CD244 molecule                                                 | -33.1 | 1.04E-03 | ENSG00000269506 | AC110792.2   | long non-coding RNA                         | 48.6 | 2.55E-04 |
| ENSG00000251226 | LINC02714  | long intergenic non-protein coding RNA 2714                    | -32.7 | 3.92E-02 | ENSG00000253137 | AC092709.1   | processed pseudogene                        | 48.0 | 4.02E-04 |
| ENSG00000186818 | LILRB4     | leukocyte immunoglobulin like receptor B4                      | -32.7 | 3.56E-03 | ENSG00000004799 | PKD4         | pyruvate dehydrogenase kinase 4             | 48.0 | 1.13E-04 |
| ENSG00000124205 | EDN3       | endothelin 3                                                   | -32.5 | 8.03E-06 | ENSG00000003989 | SLC7A2       | solute carrier family 7 member 2            | 47.8 | 2.58E-05 |
| ENSG00000197582 | GPX1P1     | processed pseudogene                                           | -32.5 | 4.55E-01 | ENSG00000186714 | CCDC73       | coiled-coil domain containing 73            | 47.6 | 2.42E-03 |
| ENSG00000205116 | TMEM88B    | transmembrane protein 88B                                      | -32.3 | 2.28E-02 | ENSG00000243715 | CACNA2D3-AS1 | long non-coding RNA antisense CACNA2D3      | 47.4 | 1.09E-04 |
| ENSG00000054179 | ENTPD2     | ectonucleoside triphosphate diphosphohydrolase 2               | -32.2 | 1.71E-04 | ENSG00000275413 | AC002553.2   | long non-coding RNA                         | 47.3 | 1.06E-03 |
| ENSG00000100362 | PVALB      | parvalbumin                                                    | -32.1 | 6.28E-03 | ENSG00000254556 | AF131215.2   | long non-coding RNA                         | 47.2 | 1.11E-04 |
| ENSG00000010319 | SEMA3G     | semaphorin 3G                                                  | -32.0 | 5.36E-06 | ENSG00000135245 | HILPDA       | hypoxia inducible lipid droplet associated  | 47.1 | 4.70E-03 |
| ENSG00000141682 | PMAI1P1    | phorbol-12-myristate-13-acetate-induced protein 1              | -32.0 | 7.52E-04 | ENSG00000134531 | EMP1         | epithelial membrane protein 1               | 47.0 | 5.03E-03 |
| ENSG00000118777 | ABCG2      | ATP binding cassette subfamily G member 2 (Junior blood group) | -31.5 | 1.98E-06 | ENSG00000229975 | LIPT1P1      | processed pseudogene                        | 46.8 | 3.43E-04 |
| ENSG00000256193 | LINC00507  | long non-coding RNA 507                                        | -31.5 | 2.76E-05 | ENSG00000260721 | AF067845.1   | long non-coding RNA                         | 46.5 | 1.36E-03 |
| ENSG00000236008 | LINC01814  | long non-coding RNA 1814                                       | -31.5 | 1.44E-03 | ENSG00000271204 | AC016831.5   | long non-coding RNA                         | 46.0 | 6.87E-05 |
| ENSG00000177133 | PRDM16-DT  | long non-coding RNA                                            | -31.3 | 7.12E-05 | ENSG00000278840 | AC009878.1   | long non-coding RNA                         | 46.0 | 5.45E-04 |
| ENSG00000207933 | MIR9-1     | microRNA 9-1                                                   | -31.3 | 2.34E-02 | ENSG00000235410 | AL157896.1   | long non-coding RNA                         | 45.9 | 3.41E-03 |
| ENSG00000184574 | LPAR5      | lysophosphatidic acid receptor 5                               | -31.3 | 2.72E-03 | ENSG00000138271 | GPR87        | G protein-coupled receptor 87               | 45.6 | 9.88E-04 |
| ENSG00000227544 | AC018647.1 | long non-coding RNA                                            | -31.2 | 1.58E-03 | ENSG00000251348 | HSPD1P11     | processed pseudogene                        | 45.4 | 8.94E-07 |
| ENSG00000280776 | LINC01202  | long non-coding RNA 507                                        | -31.2 | 1.22E-04 | ENSG00000149573 | MPZL2        | myelin protein zero like 2                  | 45.4 | 2.90E-02 |
| ENSG00000154330 | PGM5       | phosphoglucomutase 5                                           | -31.1 | 2.92E-06 | ENSG00000099860 | GADD45B      | growth arrest and DNA damage inducible beta | 45.3 | 1.12E-02 |
