# Supplementary material
Source: PubMed Central journal article supplement (PMC8379536)

Supplementary Figure 1- Contrast groups used in study

Unaffected comparison  
n=82

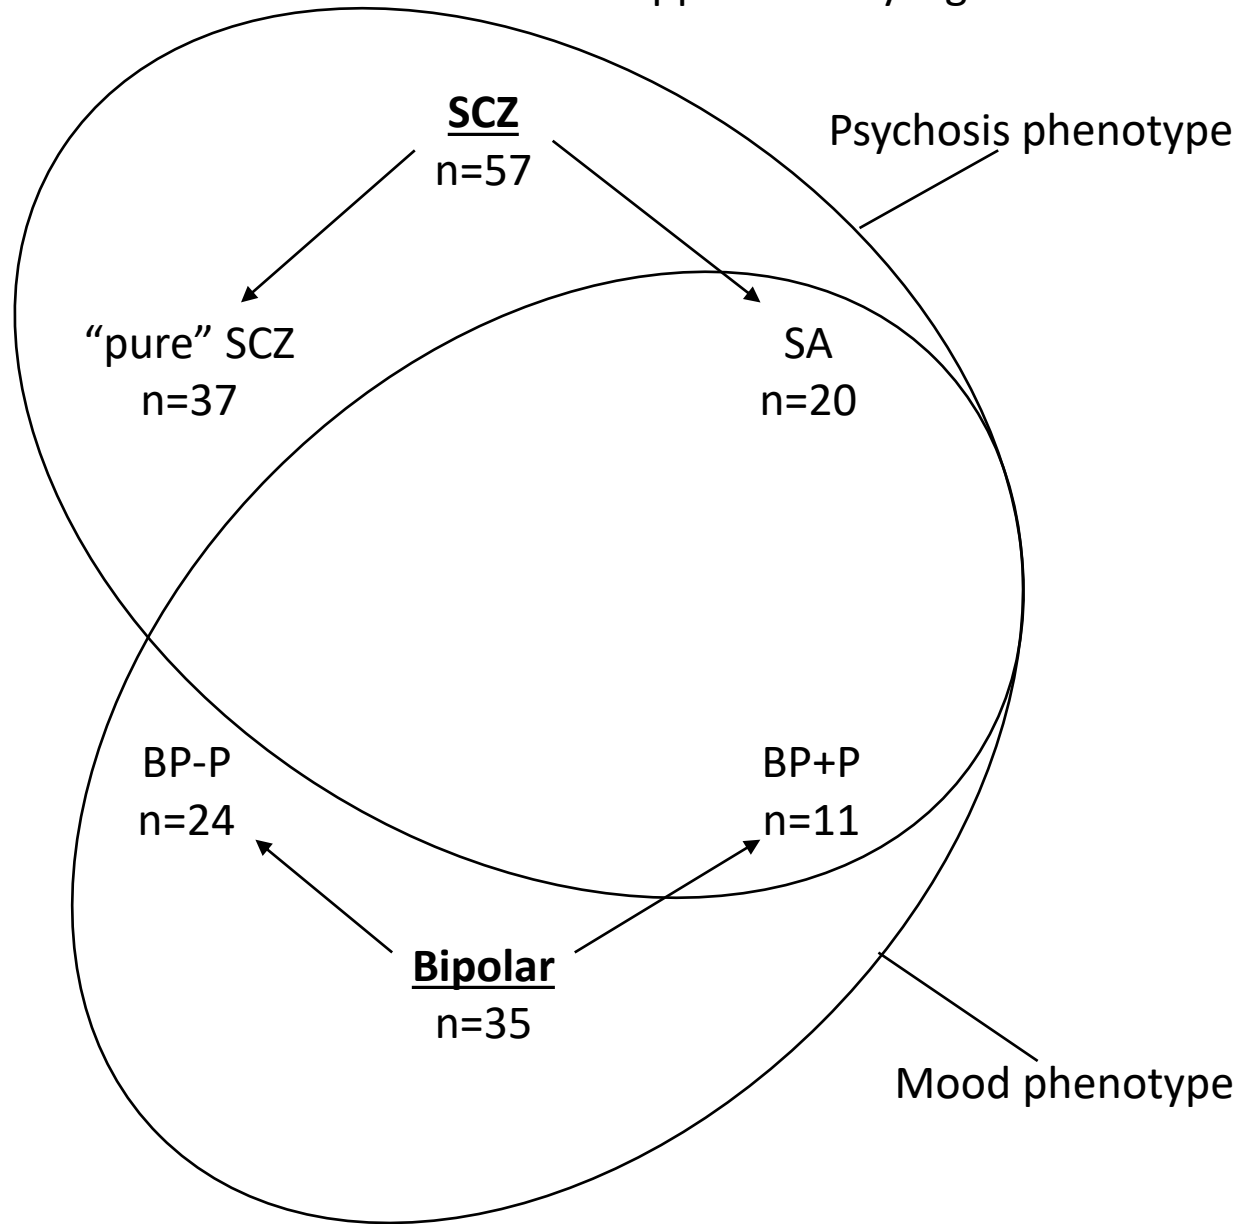

Supplement: sbaa195_suppl_supplementary_figure_1.pdf [file sbaa195_suppl_supplementary_figure_1.pdf]

Supplementary Figure 2- Bar plots of gene expression alterations

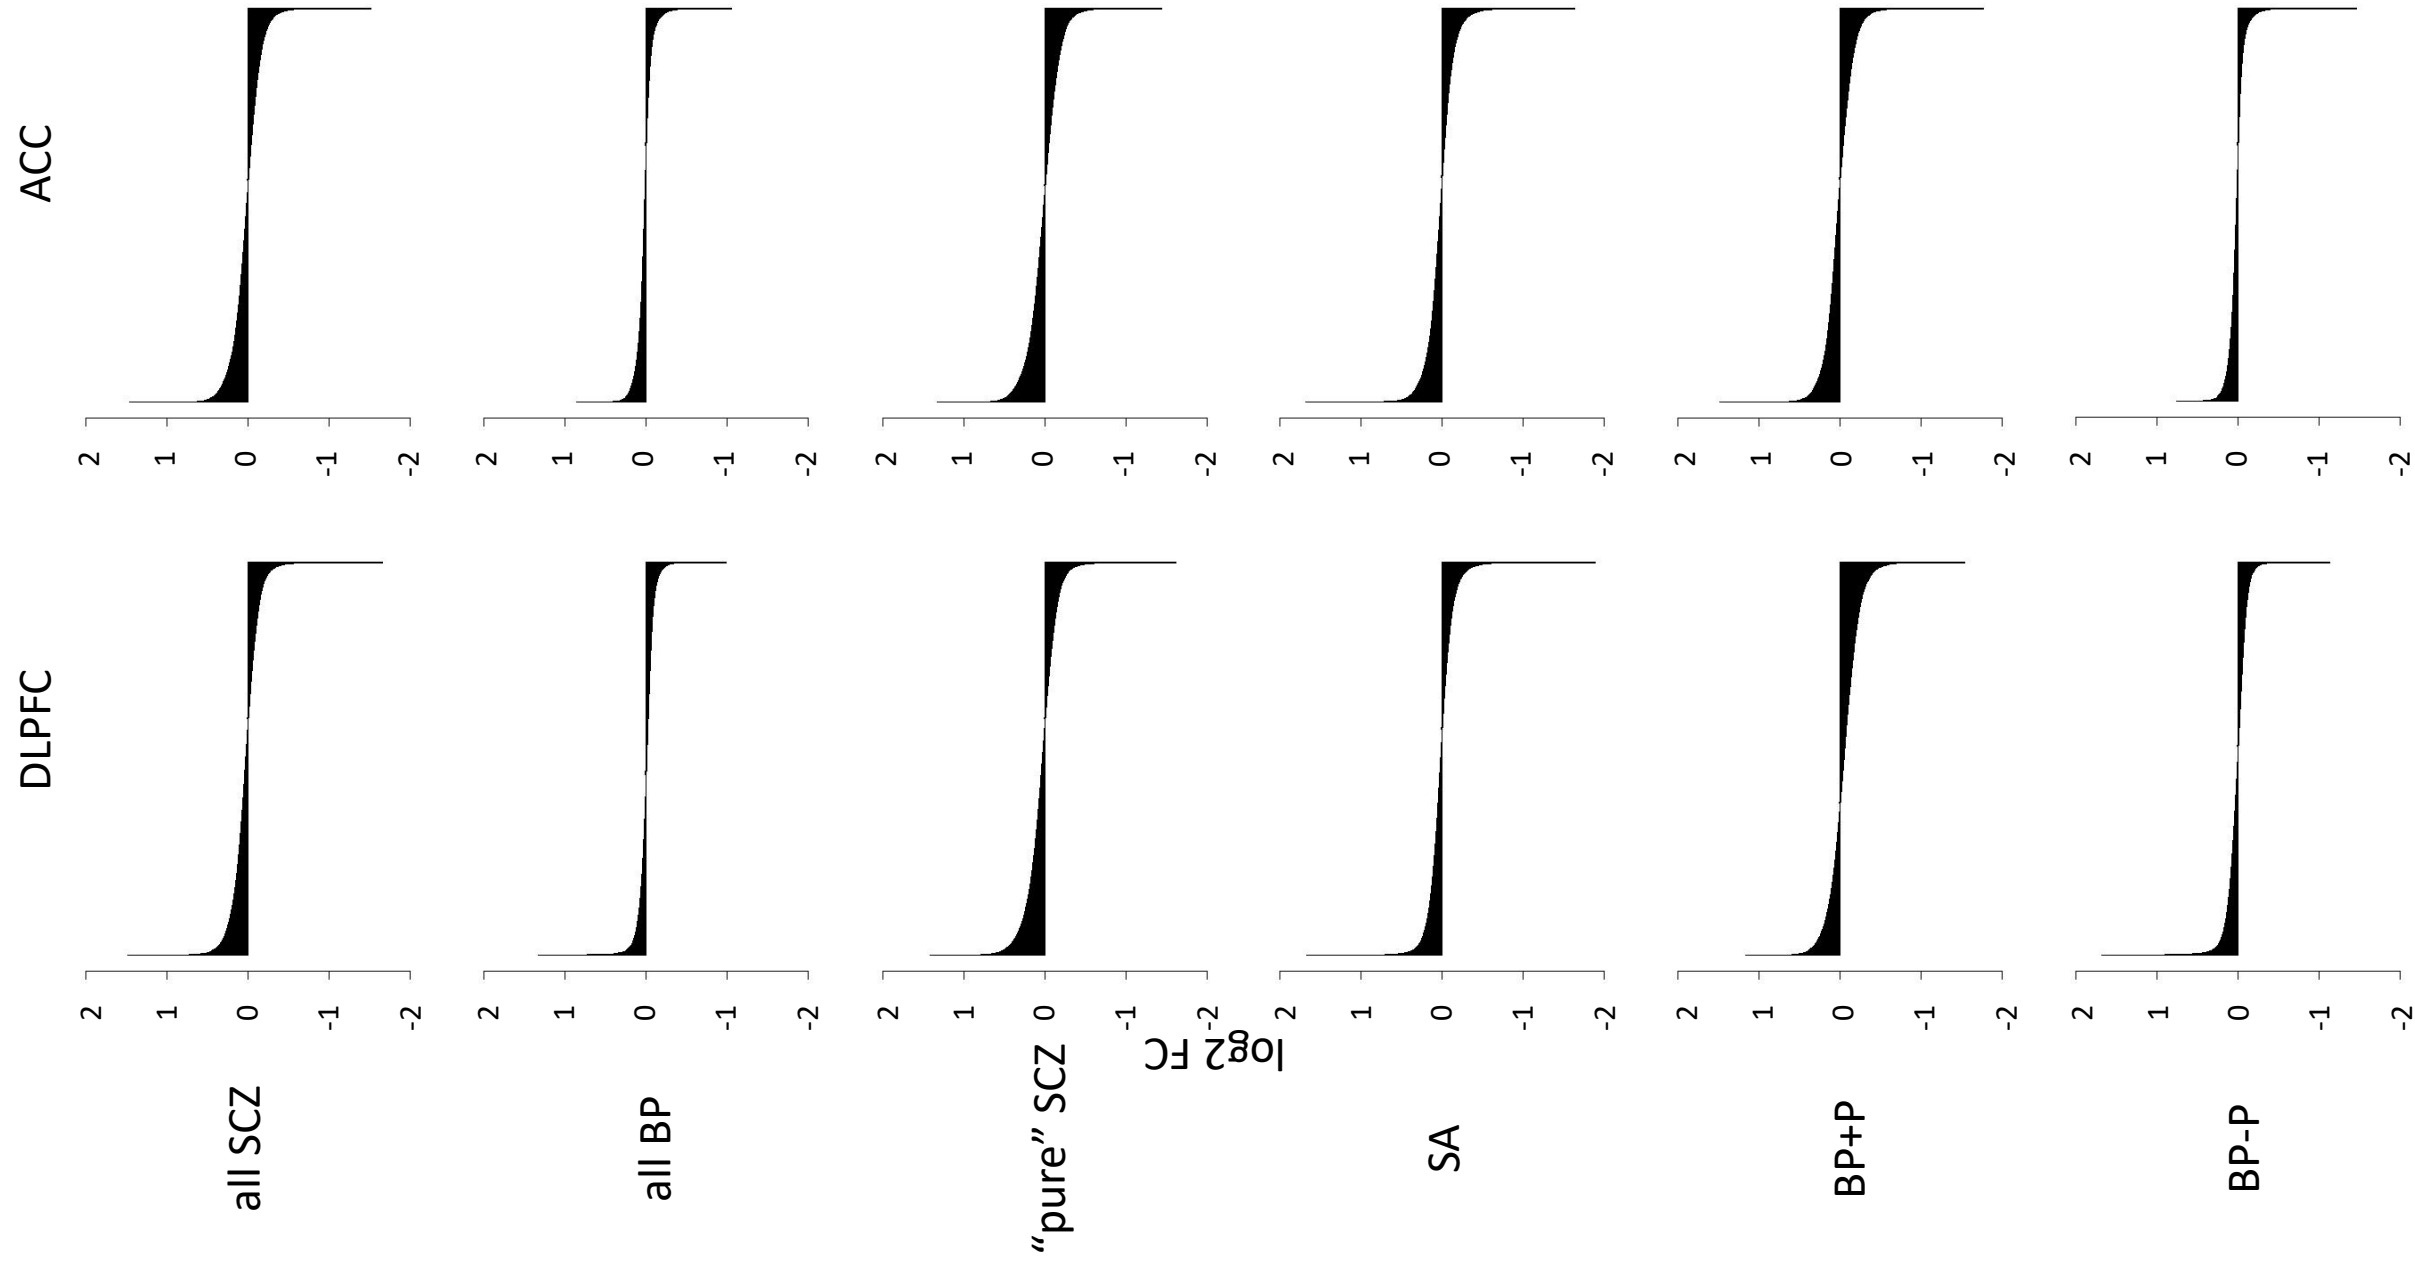

Supplement: sbaa195_suppl_supplementary_figure_2.pdf [file sbaa195_suppl_supplementary_figure_2.pdf]

Supplementary Figure 3 - Effects of antipsychotic drugs

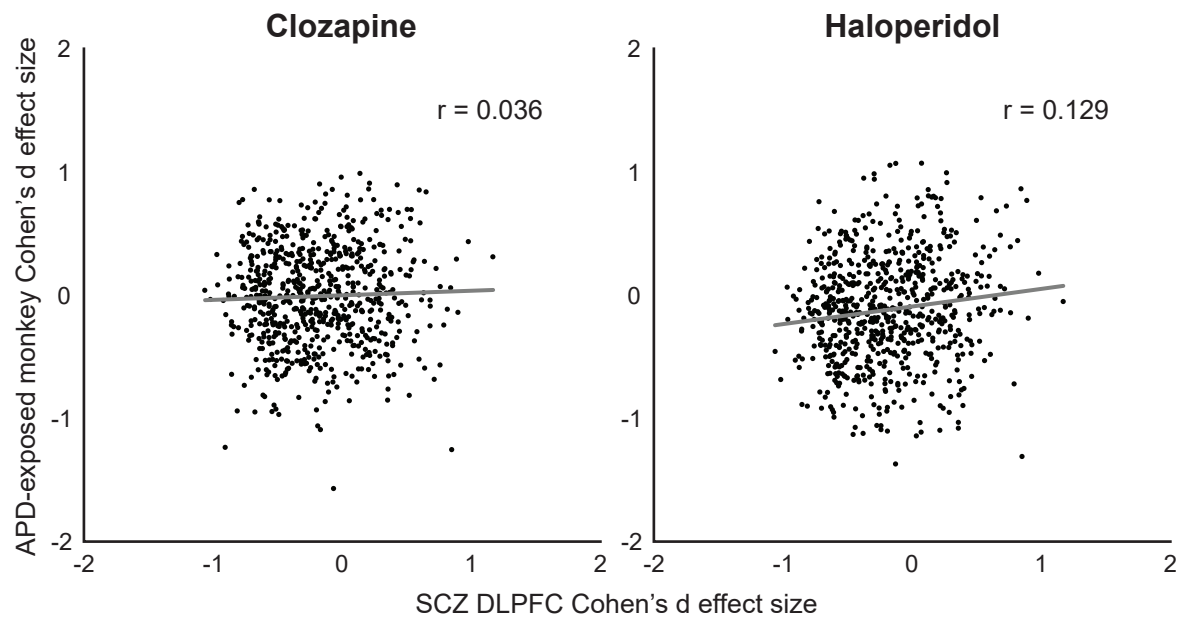

Supplement: sbaa195_suppl_supplementary_figure_3.pdf [file sbaa195_suppl_supplementary_figure_3.pdf]
